# Supplementary material for: Improving air quality assessment using physics-inspired deep graph learning
Source: Springer Nature journal article supplement (doi:10.1038/s41612-023-00475-3), 2023-09-27
Supplement: 41612_2023_475_MOESM1_ESM.pdf [file 41612_2023_475_MOESM1_ESM.pdf]

Supplementary Information for  
**Improving air quality assessment using physics-inspired deep graph learning**

Lianfa Li *et al.*

\*Corresponding author. Email: [lilf@reis.ac.cn](mailto:lilf@reis.ac.cn); [wangjf@reis.ac.cn](mailto:wangjf@reis.ac.cn)

**This PDF file includes:**

Notes 1 to 4  
Algorithms 1 to 2  
Figures 1 to 20  
Tables 1 to 11  
References 1 to 8

## Supplementary Notes

### Supplementary Note 1: Dataset

We had 56 spatial and temporal input variables including 2 spatial coordinates (latitude and longitude), elevation, day of year, ground aerosol coefficient, Aura Ozone Monitoring Instrument (OMI) NO<sub>2</sub>, planetary boundary layer height (PBLH), 4 high-resolution meteorological variables (air temperature, air pressure, relative humidity and wind speed), normalized difference vegetation index (NDVI), an indicator variable of workday (0: not a workday; 1 workday), roadway length within a 10 km buffer around each monitoring site, 26 component pollutant variables and 10 reanalysis vertical meteorological variables (three heights: 2m, 10m, 50m; used to capture vertical variations). We obtained these component pollutant and reanalysis meteorological variables from MERRA2-GMI, which is a simulation for the atmospheric composition community driven by MERRA-2 meteorology and coupled to the Global Modeling Initiative's (GMI) stratosphere-troposphere chemical mechanism run at ~50 km horizontal resolution and output onto the native MERRA-2 grid (0.625° longitude x 0.5° latitude)<sup>1</sup>. The ground aerosol coefficient<sup>2</sup> was obtained through the conversion based on the imputed Multi-Angle Implementation of Atmospheric Correction (MAIAC) aerosol optical depth (AOD), PBLH and relative humidity. MAIAC AOD, OMI-NO<sub>2</sub> and 26 component pollutant variables contain important information about emission, chemical transformation and deposition of air pollutants. The meteorological variables are the driving factors for advection and diffusion of air pollutants. For the full list of variables, please refer to [Supplementary Table 1](#).

Supplementary Note 2: Full residual deep network with the residual term of continuity equation Based on [Eq. 4](#), we have:

$$e_1 = \frac{1}{N} \ell_{RSE} \left( C, f_{\theta_{w,b}}(\mathbf{x}) \right) \quad (1)$$

$$e_2 \approx e'_2 = \frac{1}{M} \sum_{i=1}^M \left( \begin{array}{c} \frac{\partial C'_i}{\partial d_i} + v_{l_{x_i}} \frac{\partial C'_i}{\partial l_{x_i}} + v_{l_{y_i}} \frac{\partial C'_i}{\partial l_{y_i}} - \\ p_{l_{x_i}} \left( \frac{\partial^2 C'_i}{\partial^2 l_{x_i}} + \left( \frac{\partial C'_i}{\partial l_x} \right)^2 \right) - p_{l_{y_i}} \left( \frac{\partial^2 C'_i}{\partial^2 l_y} + \left( \frac{\partial C'_i}{\partial l_y} \right)^2 \right) - \rho C'_i \end{array} \right)^2 \quad (2)$$

$$e_3 = \Omega(\theta_{w,b}) \quad (3)$$

where  $C$  is the observed concentration of air pollutant,  $\mathbf{x}$  is the input vector,  $N$  is the number of samples for  $e_1$ ,  $M$  is the number of samples (including  $N$  supervised collocated samples) for  $e_2$ ,  $d_i$  is the temporal index of day for sample  $i$ ,  $l_{x_i}$  is the  $x$  coordinate for sample  $i$ ,  $l_{y_i}$  is the  $y$  coordinate for sample  $i$ ,  $f_{\theta_{w,b}}(\mathbf{x})$  is the output of the model,  $\ell_{RSE}$  is the mean square error (MSE) loss function,  $\theta_{w,b}$  is the set of parameters (weight matrix and bias) and  $\Omega(\theta_{w,b})$  is the

normalization of  $\theta_{w,b}$ . Since the dependent variable ( $C$ ) is log-transformed into  $C' = \log(C)$  and so the continuity equation (Eq. 1) changes correspondingly and thus  $e_2$  can be approximated using  $e'_2$ . We minimize the loss function, so  $e_2$  will be close to 0 and we can make the predictions to maintain the continuity equation as much as possible.

Here, the time variable of day ( $d$ ) and the horizontal directions ( $x$  and  $y$ ) were used in the residual term,  $e_2$ . The extraction of  $e_2$  is shown in Algorithm 2.

#### Supplementary Note 3: Neighborhood heatmap and SHAP values

The output from the final graph convolution layer represents the spatial agglomeration of neighborhoods in the study area, and the linear activation was used for the output of the last graph convolution. For a daily grid of 1x1 km<sup>2</sup> over the study area, the outputs of the final graph convolution layers for all the pixels that represent the spread feature of air pollution at the longest spatial scale were merged into a heatmap, which provides a visualization of the contours of the neighborhood.

As a game-theoretic approach, SHAP (Shapley Additive exPlanations)<sup>3</sup> measures the contribution of each feature to the prediction taking into account the interaction with other variables. It is calculated by comparing what a model predicts across all possible combinations of the other covariates with and without the particular feature under analysis<sup>4</sup>. With the national mean concentration of an air pollutant as the background value and 1000 selected observations as background samples, the SHAP value was estimated for each covariate of every prediction. Then the statistics of SHAP values were reported to evaluate spatiotemporal distribution of influential factors. We estimated the contribution of each covariate to PM<sub>2.5</sub>, especially those related to emissions.

#### Supplementary Note 4: AQI output

The air quality sub-index for each pollutant was calculated<sup>5</sup>:

$$IAQI_p = \frac{IAQI_{H_i} - IAQI_{L_o}}{BP_{H_i} - BP_{L_o}} (C_p - BP_{L_o}) + IAQI_{L_o} \quad (4)$$

where  $IAQI_p$  is the sub-index of air quality index for the air pollutant,  $p$ ,  $C_p$  is the measured or estimated concentration for,  $p$ ,  $BP_{L_o}$  and  $BP_{H_i}$  are respectively the low and high values

closest to the limit of  $C_p$ ,  $IAQI_{H_i}$  is the sub-index of AQI corresponding to  $BP_{H_i}$ , and  $IAQI_{L_o}$  is the sub-index of AQI corresponding to  $BP_{L_o}$ .

Then, the AQI was calculated:

$$AQI = \max \{ IAQI_1, IAQI_2, IAQI_3, \dots, IAQI_n \} \quad (5)$$

where  $IAQI$  is a sub-index of AQI for each air pollutant,  $n$  is the number of air pollutants. The primary air pollutant is defined as having the maximum sub-index of AQI.

In addition, we calculated the national averages of air pollutant concentrations and AQI weighted by the 1x1 km<sup>2</sup> population density. The population-weighted concentration or AQI was defined as:

$$\hat{M}_p = \frac{\sum_{i=1}^N \tilde{p}_i \tilde{c}_i}{\sum_{i=1}^N \tilde{p}_i} \quad (6)$$

where  $\hat{M}_p$  is the population-weighted air pollutant concentration, AQI sub-index or AQI,  $i$  is the cell index,  $\tilde{p}_i$  is the estimated population density for cell  $i$ , and  $\tilde{c}_i$  is the estimated pollutant concentration, AQI sub-index or AQI for cell  $i$ . We got the population density data from <https://www.worldpop.org>.



## Supplementary Algorithms

---

|                                                                         |                                                                                                                                                                                                                                                                                                                                                                                                                                                                                                                                                                       |
|-------------------------------------------------------------------------|-----------------------------------------------------------------------------------------------------------------------------------------------------------------------------------------------------------------------------------------------------------------------------------------------------------------------------------------------------------------------------------------------------------------------------------------------------------------------------------------------------------------------------------------------------------------------|
| <b>Supplementary Algorithm 1: MGraphAir Minibatch Forward Algorithm</b> |                                                                                                                                                                                                                                                                                                                                                                                                                                                                                                                                                                       |
| <b>Input</b>                                                            | : Set of minibatch sample indices: $\mathcal{B}$ ;<br>Input features: $\{\mathbf{x}_b, \forall b \in \mathcal{B}\}$ ;<br>Depth for convolutions: $\mathcal{K}$ ;<br>Thresholds for diffusion, velocity and ratio ;<br>Weight matrices of reciprocal distances: $\mathbf{W}_d^k, \forall k \in \{1, \dots, \mathcal{K}\}$                                                                                                                                                                                                                                              |
| <b>Output</b>                                                           | : Multilevel convolution outputs: $\mathcal{O}$                                                                                                                                                                                                                                                                                                                                                                                                                                                                                                                       |
| <b>Function</b>                                                         | : $k$ -NN nearest function: $\mathcal{N}_k, \forall k \in \{1, \dots, \mathcal{K}\}$                                                                                                                                                                                                                                                                                                                                                                                                                                                                                  |
| <b>Parameter:</b>                                                       | Diffusion coefficient: $\mathbf{p}^k, \forall k \in \{1, \dots, \mathcal{K}\}$ ;<br>Velocity: $\mathbf{v}^k, \forall k \in \{1, \dots, \mathcal{K}\}$ ;<br>Ratio for emissions, deposition etc.: $\rho^k, \forall k \in \{1, \dots, \mathcal{K}\}$ ;<br>Weight matrices for total summary: $\mathbf{W}_c^k, \forall k \in \{1, \dots, \mathcal{K}\}$ ;<br>Weight matrices for neighbor aggregation: $\mathbf{W}_u^k, \forall k \in \{1, \dots, \mathcal{K}\}$ ;<br>Weight matrices of reciprocal distances: $\mathbf{W}_d^k, \forall k \in \{1, \dots, \mathcal{K}\}$ |
| 1                                                                       | $\mathcal{B}^{\mathcal{K}} \leftarrow \mathcal{B}$ ;                                                                                                                                                                                                                                                                                                                                                                                                                                                                                                                  |
| 2                                                                       | <b>for</b> $k = \mathcal{K} \dots 1$ <b>do</b>                                                                                                                                                                                                                                                                                                                                                                                                                                                                                                                        |
| 3                                                                       | $\mathcal{B}^{k-1} \leftarrow \mathcal{B}^k$ ;                                                                                                                                                                                                                                                                                                                                                                                                                                                                                                                        |
| 4                                                                       | <b>for</b> $i \in \mathcal{B}^k$ <b>do</b>                                                                                                                                                                                                                                                                                                                                                                                                                                                                                                                            |
| 5                                                                       | $\mathcal{B}^{k-1} \leftarrow \mathcal{B}^{k-1} \cup \mathcal{N}_k(i)$ ;                                                                                                                                                                                                                                                                                                                                                                                                                                                                                              |
| 6                                                                       | <b>end for</b>                                                                                                                                                                                                                                                                                                                                                                                                                                                                                                                                                        |
| 7                                                                       | <b>end for</b>                                                                                                                                                                                                                                                                                                                                                                                                                                                                                                                                                        |
| 8                                                                       | $\mathbf{h}_b^0 \leftarrow \mathbf{x}_b, \forall b \in \mathcal{B}^0$ ;                                                                                                                                                                                                                                                                                                                                                                                                                                                                                               |
| 9                                                                       | Initialize learnable parameters: $\mathbf{p}^k, \mathbf{v}^k, \rho^k, \mathbf{W}_c^k, \mathbf{W}_u^k, \mathbf{W}_d^k$ ;                                                                                                                                                                                                                                                                                                                                                                                                                                               |
| 10                                                                      | Set thresholds for diffusion, velocity and ratio ;                                                                                                                                                                                                                                                                                                                                                                                                                                                                                                                    |
| 11                                                                      | <b>for</b> $k = 1 \dots \mathcal{K}$ <b>do</b>                                                                                                                                                                                                                                                                                                                                                                                                                                                                                                                        |
| 12                                                                      | <b>for</b> $i \in \mathcal{B}^k$ <b>do</b>                                                                                                                                                                                                                                                                                                                                                                                                                                                                                                                            |
| 13                                                                      | $\mathbf{h}_{\mathcal{N}(i)}^k \leftarrow \mathbf{p}^k \cdot \sum_{j \in \mathcal{N}_k(i)} (\mathbf{h}_j^{k-1} - \mathbf{h}_i^{k-1}) - \mathbf{v}^k \cdot \sum_{j \in \mathcal{N}_k(i)} w_{d_{ij}}^{k-1} (\mathbf{h}_j^{k-1} - \mathbf{h}_i^{k-1})$ ;                                                                                                                                                                                                                                                                                                                 |
| 14                                                                      | $\mathbf{h}_{\mathcal{N}(i)}^k \leftarrow \mathbf{h}_{\mathcal{N}(i)}^k + \rho^k \cdot \mathbf{h}_i^{k-1}$ ;                                                                                                                                                                                                                                                                                                                                                                                                                                                          |
| 15                                                                      | $\mathbf{h}_i^k \leftarrow \sigma(\mathbf{W}_c^k \cdot \mathbf{h}_i^{k-1} - \mathbf{W}_u^k \cdot \mathbf{h}_{\mathcal{N}(i)}^k)$ ;                                                                                                                                                                                                                                                                                                                                                                                                                                    |
| 16                                                                      | $\mathbf{h}_i^k \leftarrow \text{BN}(\mathbf{h}_i^k)$ ;                                                                                                                                                                                                                                                                                                                                                                                                                                                                                                               |
| 17                                                                      | <b>end for</b>                                                                                                                                                                                                                                                                                                                                                                                                                                                                                                                                                        |
| 18                                                                      | <b>if</b> $k = 1$ <b>then</b>                                                                                                                                                                                                                                                                                                                                                                                                                                                                                                                                         |
| 19                                                                      | $\mathcal{O} = \mathbf{h}_i^k, \forall i \in \mathcal{B}^{\mathcal{K}}$ ;                                                                                                                                                                                                                                                                                                                                                                                                                                                                                             |
| 20                                                                      | <b>else</b>                                                                                                                                                                                                                                                                                                                                                                                                                                                                                                                                                           |
| 21                                                                      | $\mathcal{O} \leftarrow \mathcal{O} \cup \mathbf{h}_i^k, \forall i \in \mathcal{B}^{\mathcal{K}}$ ;                                                                                                                                                                                                                                                                                                                                                                                                                                                                   |
| 22                                                                      | <b>end if</b>                                                                                                                                                                                                                                                                                                                                                                                                                                                                                                                                                         |
| 23                                                                      | <b>end for</b>                                                                                                                                                                                                                                                                                                                                                                                                                                                                                                                                                        |
| 24                                                                      | Return $\mathcal{O}$                                                                                                                                                                                                                                                                                                                                                                                                                                                                                                                                                  |

---

---

**Supplementary Algorithm 2: Continuity Equation Residual Forward Algorithm**


---

**Input** : Module of main MGraph:  $\mathcal{M}$  ;  
 Input features:  $\{\mathbf{x}\}$  ;  
 Adjacent topology matrix:  $\mathcal{N}_{\mathbf{x}}$  ;  
 List of the node numbers for all layers:  $\mathcal{L}$  ;  
 List of decoding layers:  $\mathcal{L}_d$  ;  
 Time column index (day):  $d$  ;  
 Thresholds for velocity, diffusion and ratio  
**Output** : Prediction and residual outputs:  $\mathcal{O}$   
**Function** : Partial derivative by AD:  $grad$   
**Parameter**: Hidden layers:  $\mathcal{H}_l, \forall l \in \{1, \dots, \mathcal{L} + 2\}$  ;  
 Velocity:  $v_{l_x}, v_{l_y}$  ; Diffusion:  $p_{l_x}, p_{l_y}$  ; Ratio:  $\rho$

- 1 Initialize the parameters ;
- 2 Set the thresholds for  $v_{l_x}, v_{l_y}, p_{l_x}, p_{l_y}, \rho$  ;
- 3  $\tilde{\mathbf{c}} \leftarrow \mathcal{M}(\mathbf{x}, \mathcal{N}_{\mathbf{x}})$  ;
- 4  $\partial \tilde{\mathbf{c}} / \partial l_x \leftarrow grad(\tilde{\mathbf{c}}, l_x)$  ;
- 5  $\partial^2 \tilde{\mathbf{c}} / \partial^2 l_x \leftarrow grad(\partial \tilde{\mathbf{c}} / \partial l_x, l_x)$  ;
- 6  $\partial \tilde{\mathbf{c}} / \partial l_y \leftarrow grad(\tilde{\mathbf{c}}, l_y)$  ;
- 7  $\partial^2 \tilde{\mathbf{c}} / \partial^2 l_y \leftarrow grad(\partial \tilde{\mathbf{c}} / \partial l_y, l_y)$  ;
- 8  $\partial \tilde{\mathbf{c}} / \partial d \leftarrow grad(\tilde{\mathbf{c}}, d)$  ;
- 9  $S.push(\mathbf{x})$  ;
- 10  $\mathbf{x} \leftarrow \mathbf{BN}(\sigma(\mathcal{H}_1(\mathbf{x})))$  ;
- 11 **for**  $i = 2 \dots \text{len}(\mathcal{L})$  **do**
- 12 **if**  $i \leq (\mathcal{L}_d - 1)$  **then**
- 13  $S.push(\mathbf{x})$  ;
- 14  $\mathbf{x} \leftarrow \mathbf{BN}(\sigma(\mathcal{H}_i(\mathbf{x})))$  ;
- 15 **if**  $i \geq (\mathcal{L}_d)$  **then**
- 16  $\mathbf{x} \leftarrow \mathbf{x} + S.pop()$  ;
- 17 **end for**
- 18  $\mathbf{x} \leftarrow \mathbf{BN}(\sigma(\mathcal{H}_{\mathcal{L}+1}(\mathbf{x})))$  ;
- 19  $\mathbf{x} \leftarrow \mathbf{x} + S.pop()$  ;
- 20  $\zeta \leftarrow \mathcal{H}_{\mathcal{L}+2}(\mathbf{x})$  ;
- 21  $v_{l_x} \leftarrow \zeta[1], v_{l_y} \leftarrow \zeta[2], p_{l_x} \leftarrow \zeta[3], p_{l_y} \leftarrow \zeta[4], \rho \leftarrow \zeta[5]$  ;
- 22  $\mathcal{R} = \frac{\partial \tilde{\mathbf{c}}}{\partial d} + \frac{\partial \tilde{\mathbf{c}}}{\partial l_x} v_{l_x} + \frac{\partial \tilde{\mathbf{c}}}{\partial l_y} v_{l_y} - \rho \tilde{\mathbf{c}}$  ;
- 23  $\mathcal{R} = \mathcal{R} - (\frac{\partial^2 \tilde{\mathbf{c}}}{\partial^2 l_x} + (\frac{\partial \tilde{\mathbf{c}}}{\partial l_x})^2) p_{l_x} - (\frac{\partial^2 \tilde{\mathbf{c}}}{\partial^2 l_y} + (\frac{\partial \tilde{\mathbf{c}}}{\partial l_y})^2) p_{l_y}$  ;
- 24  $\mathcal{O} \leftarrow (\tilde{\mathbf{c}}, \mathcal{R})$  ;
- 25 **Return**  $\mathcal{O}$

---

## Supplementary Figures

### Supplementary Figure 1

**Mapping of advection, diffusion and the others (chemical transformation, emissions and deposition).** a, using the continuity PDE in a grid cell to simulate. b, c and d, the graph space. e, mapping of the features.

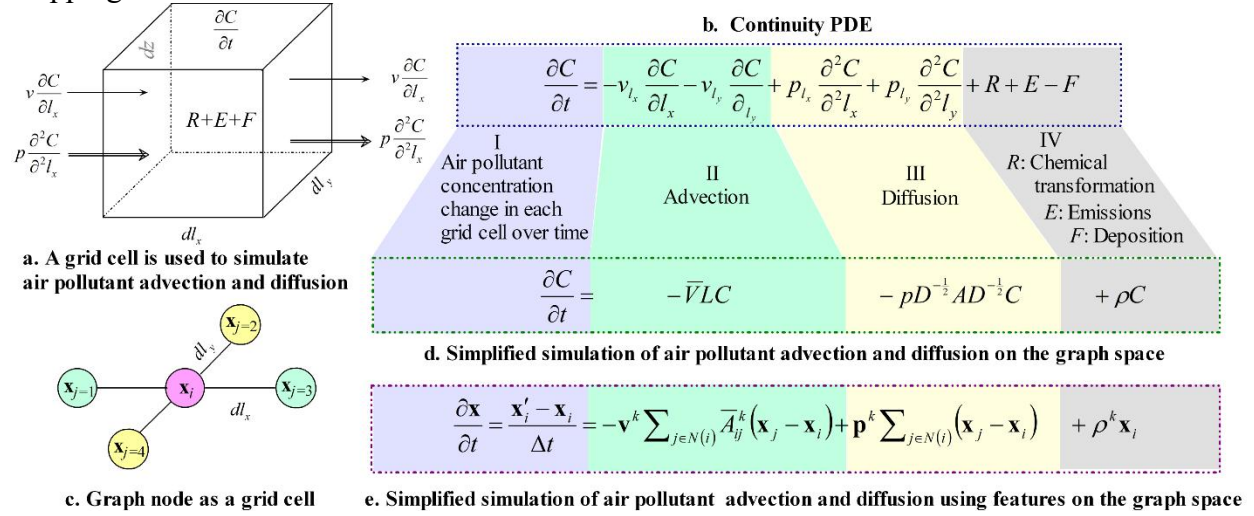

## Supplementary Figure 2

**Traffic simulation of air pollutants in the discrete graph space.** a, diffusion was simulated using PDE based on thermodynamic laws. b, the graph convolution process was used to simulate the horizontal advection and diffusion, and the input contains the meteorological driving force for the pollutant movement and other covariates to account for the other changes. c, messaging and aggregating from neighbors in the local graph space were used to represent local multiscale spread of air pollutants.

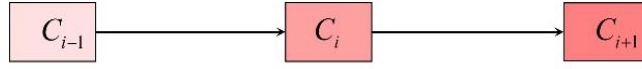

$$\frac{\partial C_i}{\partial t} = -\bar{v} \cdot \frac{(C_{i+1} - C_{i-1}))}{2} + p((C_{i+1} - C_i) - (C_i - C_{i-1})) = -\bar{v} \cdot \frac{(C_{i+1} - C_{i-1}))}{2} + p \sum_j (C_j - C_i) \quad p = k_x + m$$

$$\Rightarrow \frac{\partial C_x}{\partial t} = -\bar{v}_x \frac{\partial C_x}{\partial x} + p \frac{\partial^2 C_x}{\partial^2 x} \quad p: \text{Diffusion coefficient that is the sum of eddy diffusion coefficient } (k_x) \text{ and molecular diffusion coefficient } (m)$$

### a. Simplified simulation of the diffusion of air pollutant in the x direction

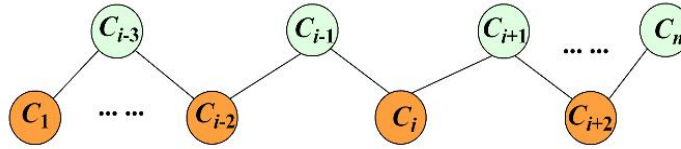

**Simulation of second-order derivatives:** Use Laplacian matrix

$$-p \sum_j A_{ij} (C_i - C_j) = -p \left( D(C_i) C_i - \sum_j A_{ij} C_j \right) \Rightarrow p \frac{\partial^2 C}{\partial^2 x} = -p(D - A)C = -pLC$$

$A$ : Adjacency matrix;  $D$ : Degree matrix;  $L$ : Laplacian matrix ( $L = D - A$ )

Corresponding Laplacian convolutional operator:  $D^{-1/2} A D^{-1/2} H^{(l)} W^{(l)}$

**Simulation of first-order derivatives:** Decompose the differential equation along the linked directions (nodes)

$$-\frac{\partial \bar{v} C_i}{\partial x} = -\sum_j \bar{v}_{ij} (C_j - C_i) \Rightarrow -\frac{\partial \bar{v} C}{\partial x} = -\bar{v} L C$$

$\bar{v}$ : Learnable speed matrix based on the Adjacency matrix  $A$

### b. Simulation of air pollutant convection on the graph space

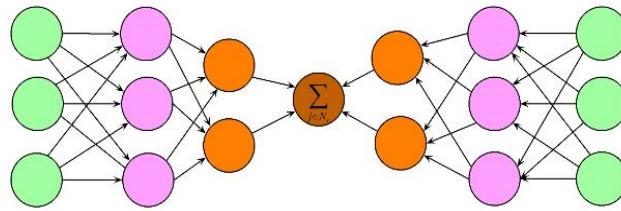

→ Message passing  $\sum_{j \in N}$  Aggregate

### c. Multiscale message passing and aggregating on the local graph space

### Supplementary Figure 3

**Site-based test RMSE boxplot of seven air pollutants by eight methods.** a, c, e, g, i, k and m show testing RMSE and b, d, f, h, j, l and n show site-based independent testing RMSE. Method: Deep graph modeling (DGM) proposed; Full residual encoder-decoder (FRE); GraphSAGE (SAGE); Random forest (RF); XGBoost (XGB); Kriging (Kri); Regression kriging (RKri); Generalized additive model (GAM). The whiskers (solid horizontal lines) represent the minimum and maximum RMSE, excluding outliers. The box bounds the interquartile range (IQR) from the 25<sup>th</sup> to 75<sup>th</sup> percentiles, with the 50<sup>th</sup> percentile (median) as the bold line inside. The whiskers (dashed vertical lines) extend 1.5 times the IQR from the box, indicating the normal RMSE range. Data points (small circles) outside the whiskers are RMSE outliers.

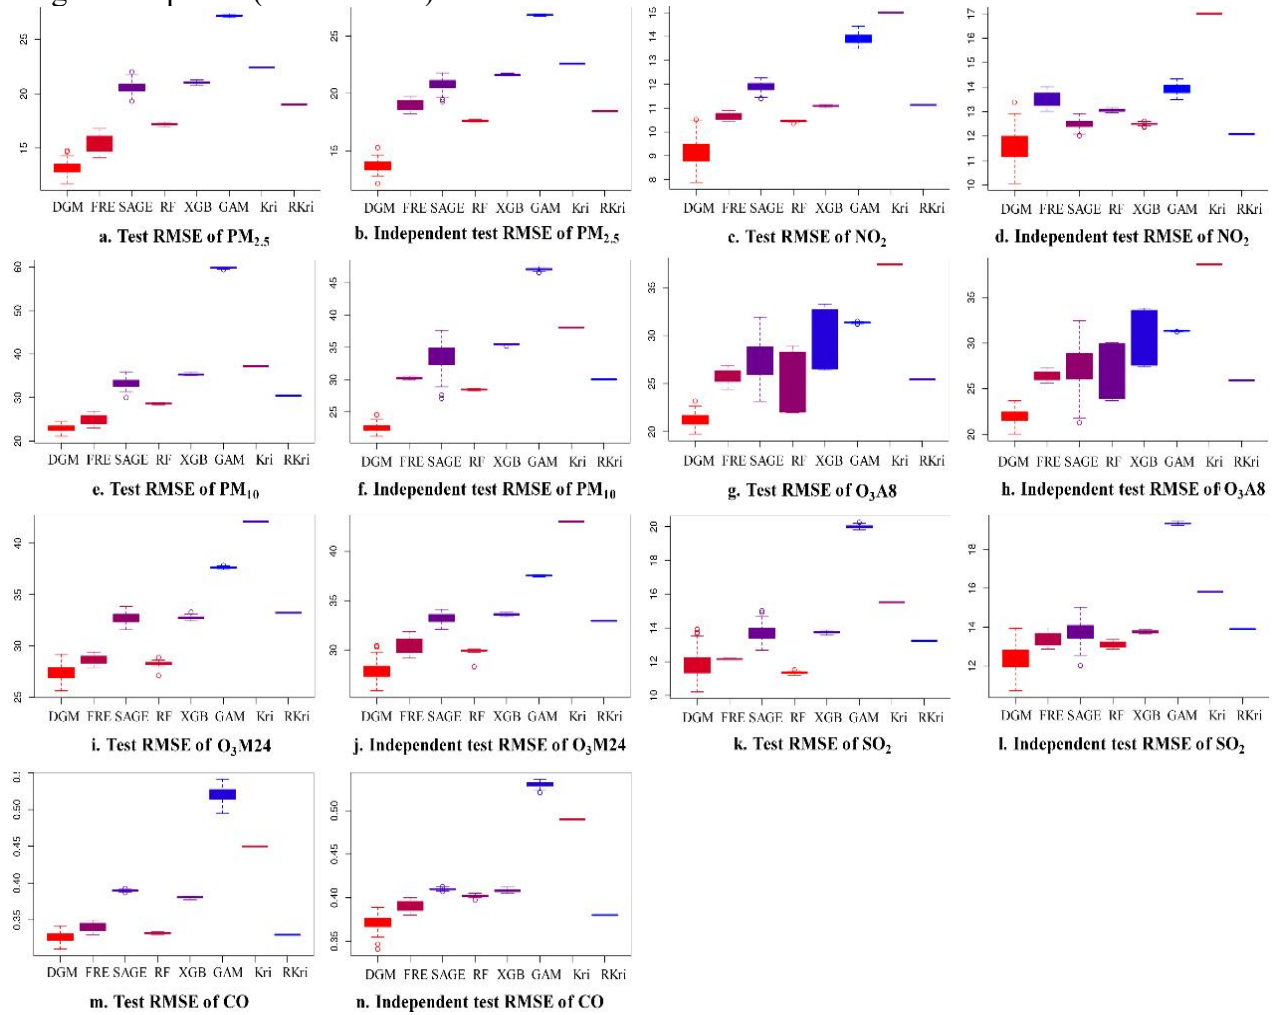

### Supplementary Figure 4

**Histogram and density plots for the measured values vs. inversed samples in the site-based independent tests of six air pollutants.**

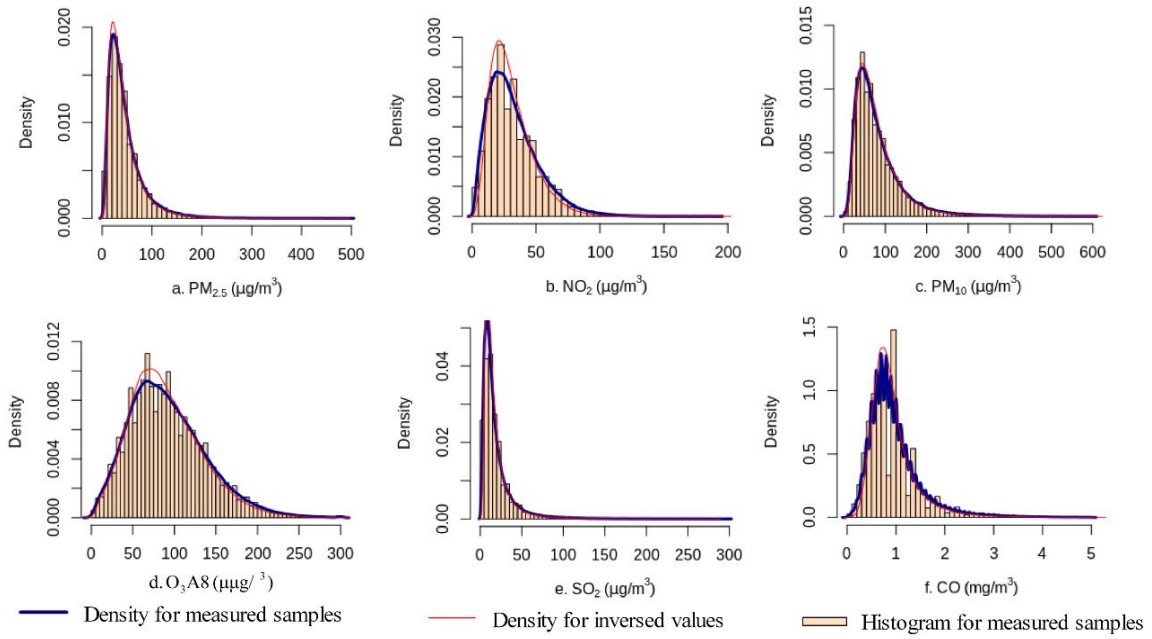

## Supplementary Figure 5

Comparison of RMSE violin plots between our DGM method and various machine learning approaches, illustrating the predicted versus observed time series for all sites in the site-based independent test.

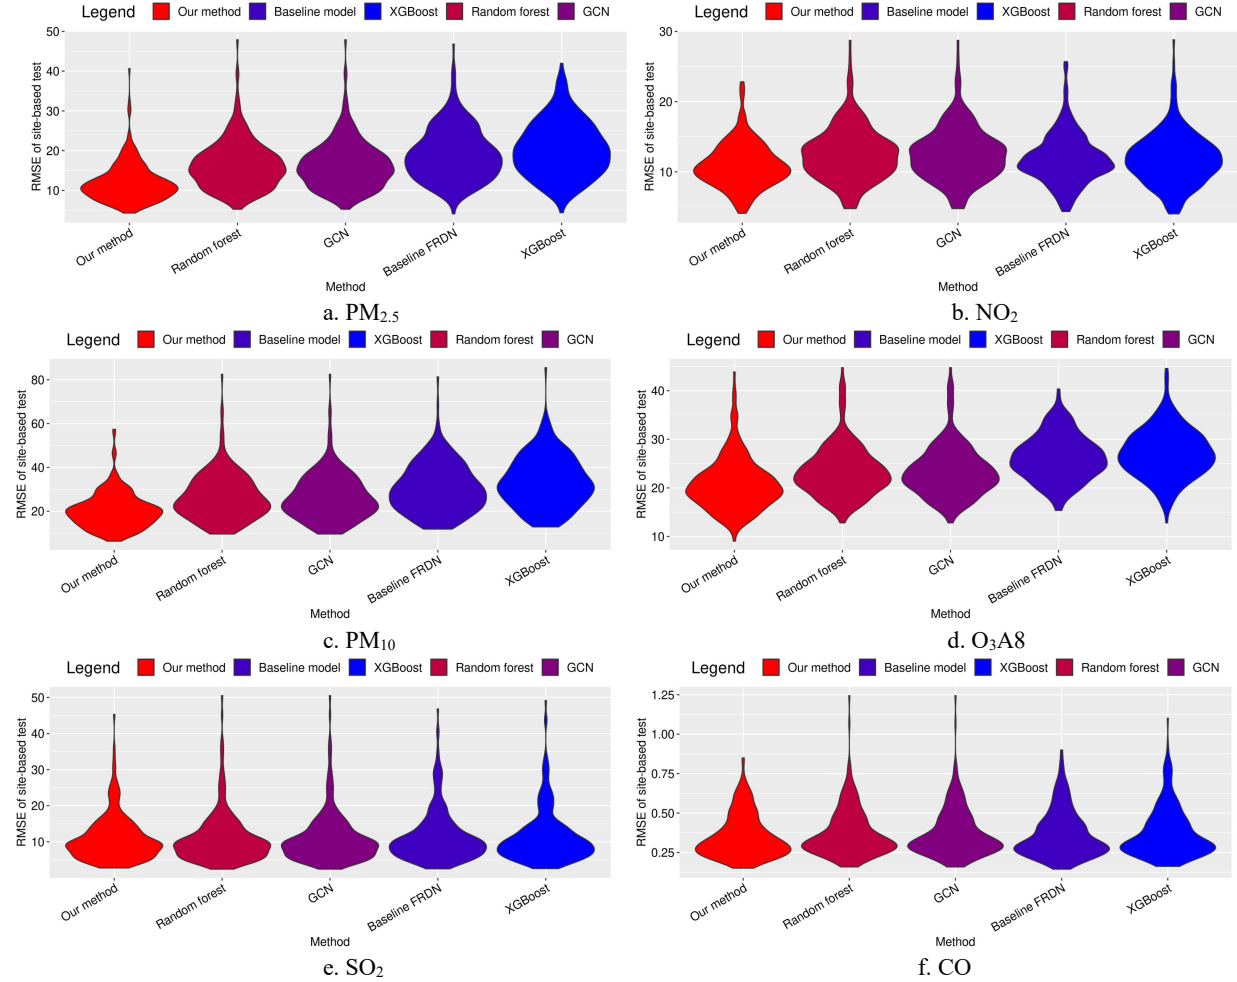

## Supplementary Figure 6

**Contributions (SHAP) of the emission-related components to the PM<sub>2.5</sub> predictions for four representative regions of China.** a, China Mainland. b, the Jing-Jin-Ji metropolitan region. c, Yangtze River Delta. d, Pearl River Delta. e, Xinjiang Zhuang Autonomous Region. BC: Black carbon mass mixing ratio; DMSSMASS: DMS surface mass concentration; DUST: Dust surface mass concentration; GAE: Ground aerosol extinction coefficient; HNO3SMASS: Nitric acid surface mass concentration; Neighborhood: Neighborhood feature extracted using GC; NI: Nitrate Mass Mixing Ratio; NO: Nitric oxide; NO<sub>2</sub>: Nitrogen dioxide; O<sub>3</sub>: Ozone; OCS: Organic Carbon Surface Mass Concentration; SO<sub>2</sub>: SO<sub>2</sub> Surface Mass Concentration.

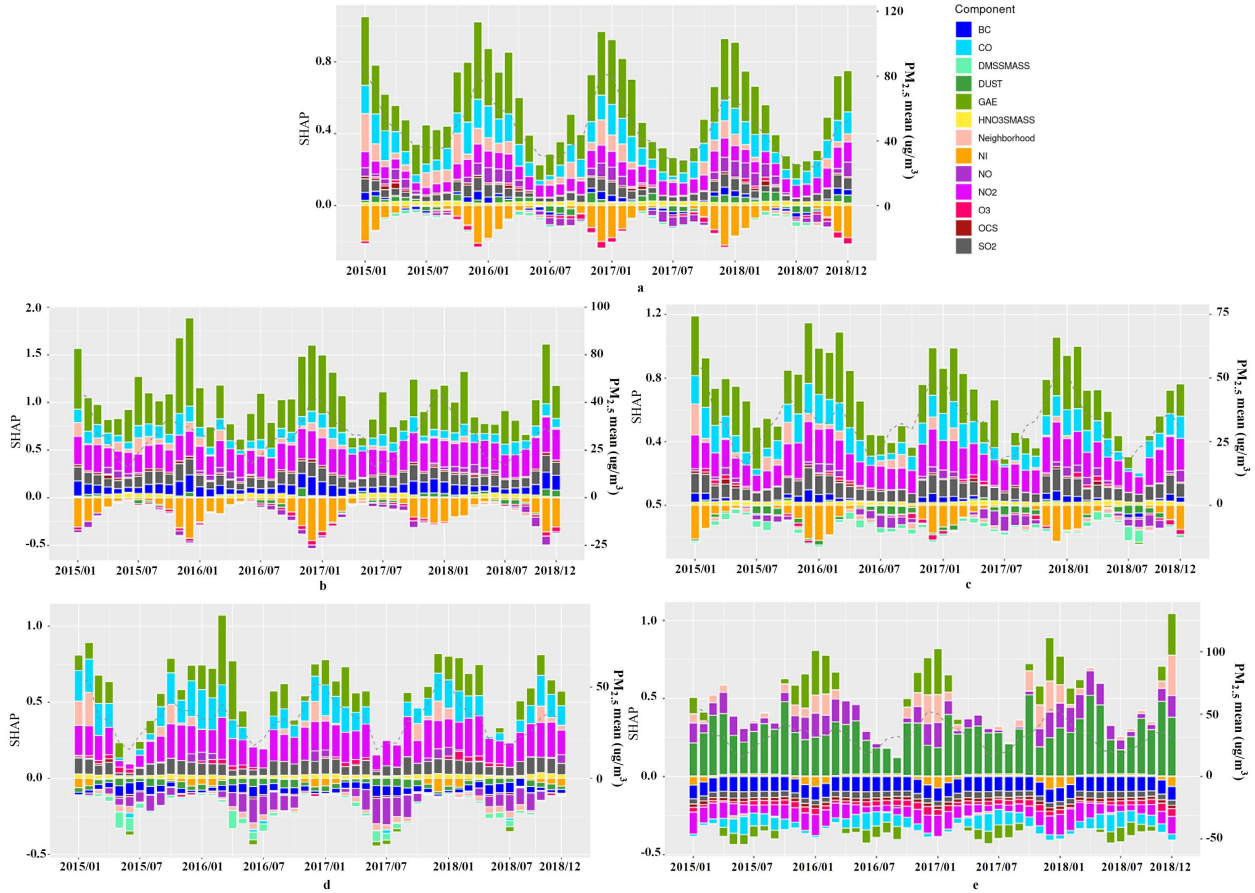



### Supplementary Figure 7

#### Spatiotemporal evolution of PM<sub>10</sub> for the sandstorm event in North China of April 15, 2015.

a-f, national (the upper part) and local (the lower part of the Jingjinji metropolitan region) spatial distributions of estimated PM<sub>10</sub> concentrations from April 11 to 16, 2015. The blue arrow is mean ground wind vector (m/s), the color gradient lines in each upper image show the contours of the graphical convolution heatmap, and the gray lines in each below enlarged image show major traffic roads.

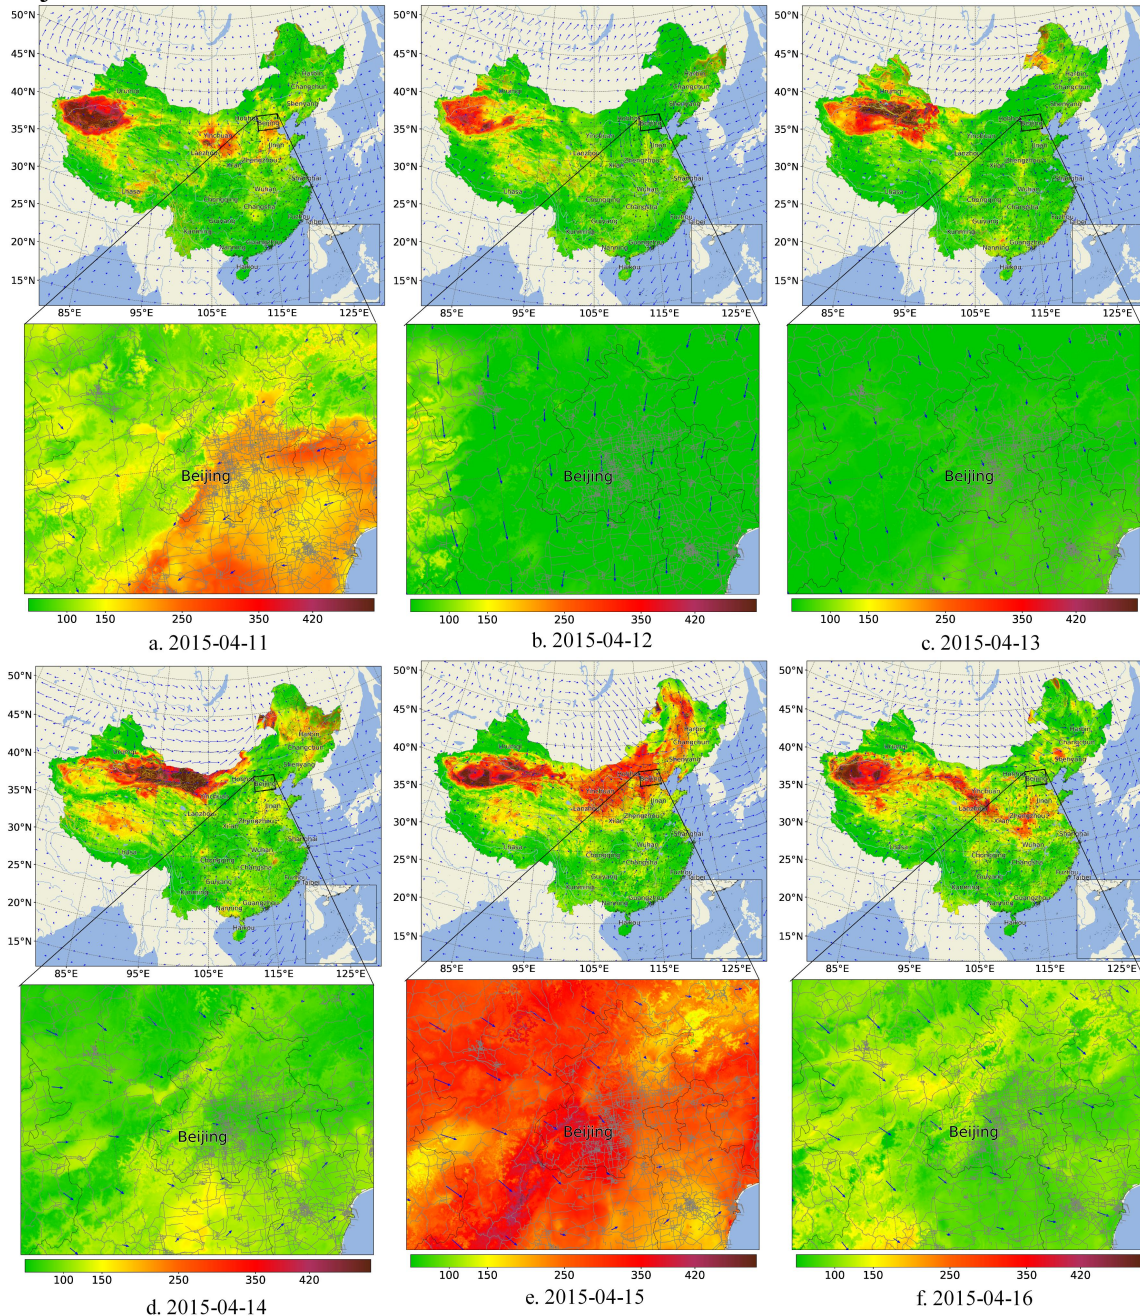



### Supplementary Figure 8

**Spatiotemporal evolution of PM<sub>2.5</sub> for the sandstorm event in North China of April 15, 2015.** a-f, national (the upper part) and local (the lower part of the Jingjinji metropolitan region) spatial distributions of estimated PM<sub>2.5</sub> concentrations from April 11 to 16, 2015. The blue arrow is mean ground wind vector (m/s), the color gradient lines in each upper image show the contours of the graphical convolution heatmap, and the gray lines in each below enlarged image show major traffic roads.

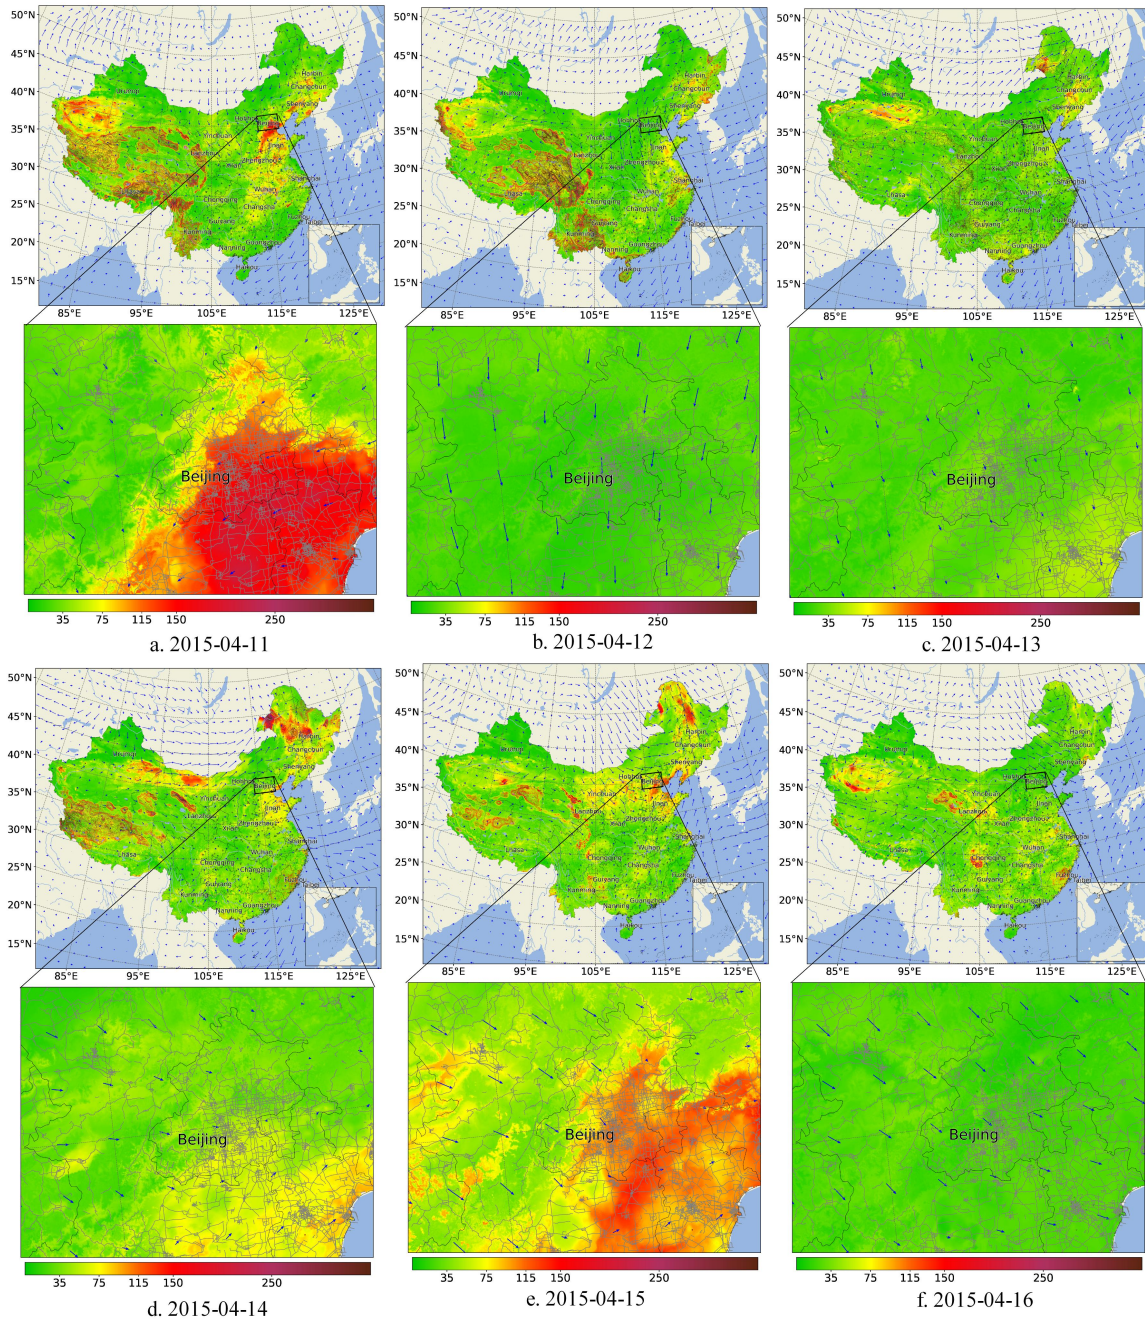

### Supplementary Figure 9

**Comparison between estimated and measured  $PM_{10}$ ,  $PM_{2.5}$  and  $NO_2$  for mainland China on April 15, 2015.** a, b and c, log-transformed probability density of  $PM_{2.5}$  (a),  $NO_2$  (b) and  $PM_{10}$  (c). d and e, 2-d histograms of  $PM_{2.5}$  and  $PM_{10}$  for national measured data (d) and national inversed data (e).

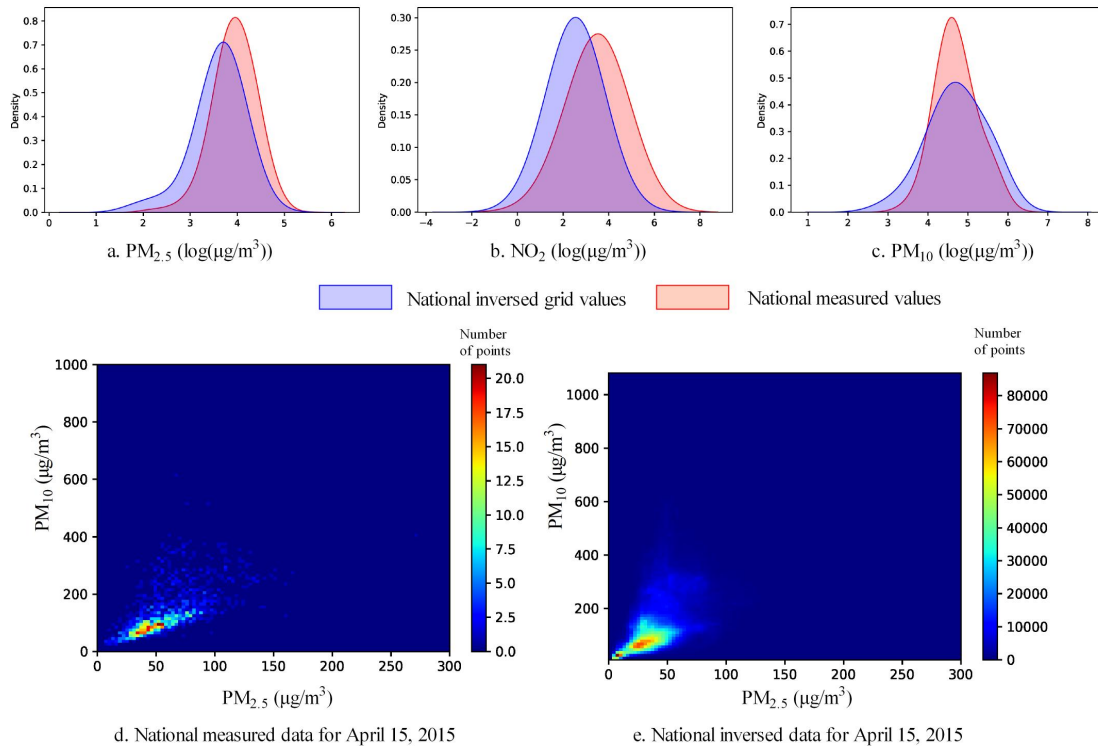



### Supplementary Figure 10

#### Spatiotemporal evolution of PM<sub>2.5</sub> for the haze event in East China of December 23, 2016.

a-f, national (the upper part) and local (the lower part of the Yangtze River Delta) spatial distributions of estimated PM<sub>2.5</sub> concentrations from December 19 to 24, 2016. The blue arrow is mean ground wind vector (m/s), the color gradient lines in each upper image show the contours of the graphical convolution heatmap, and the gray lines in each below enlarged image show major traffic roads.

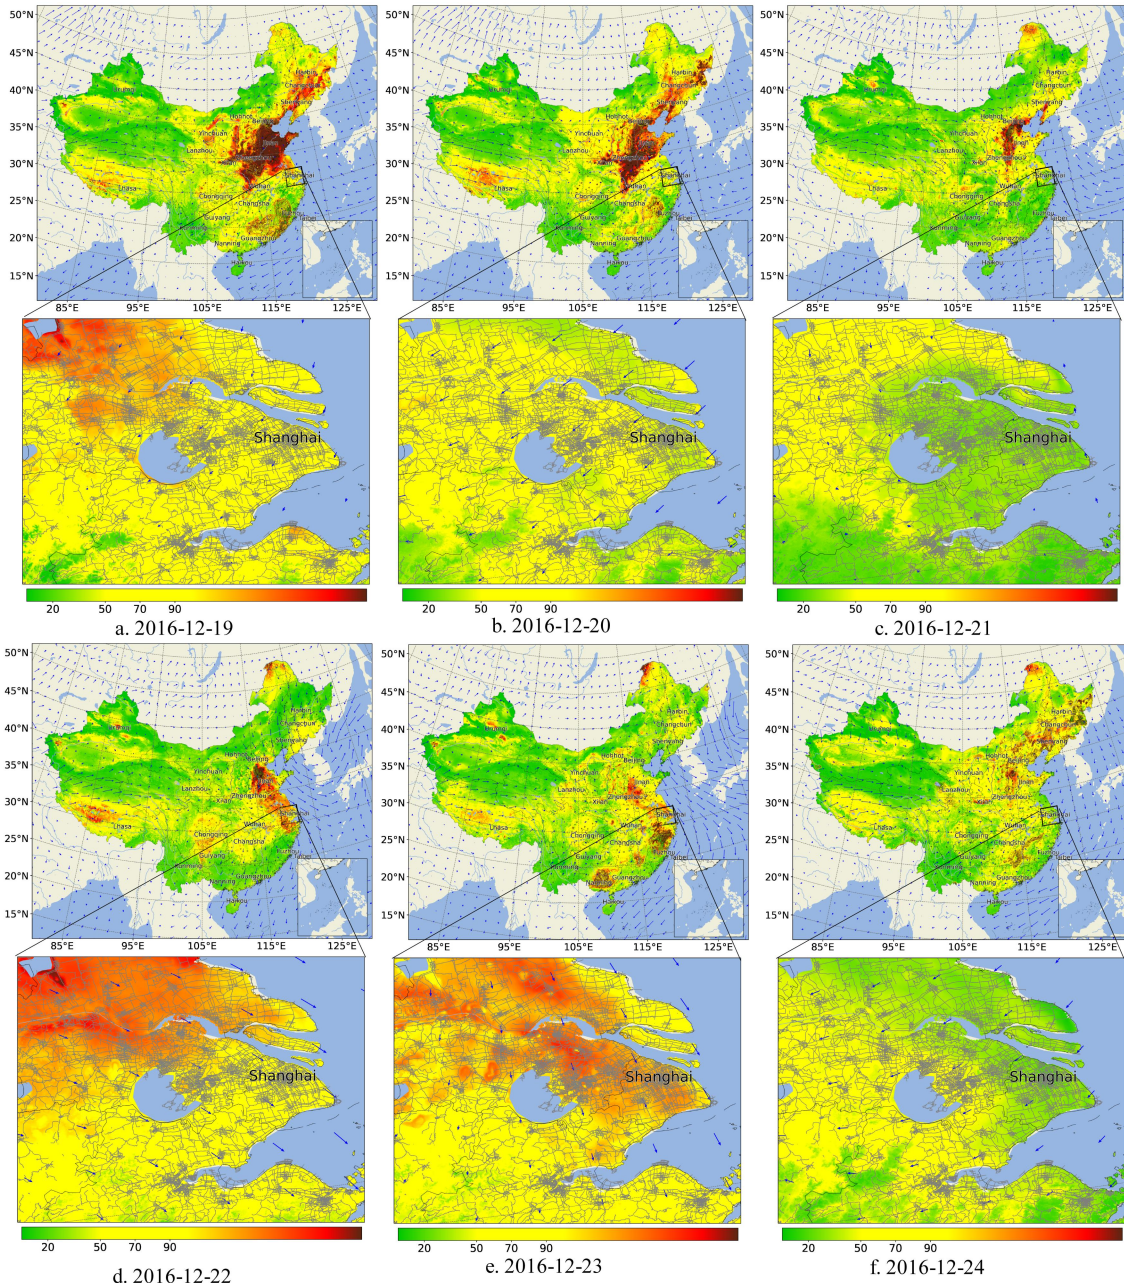



### Supplementary Figure 11

**Spatiotemporal evolution of O<sub>3</sub> for the ozone event of July 1, 2017.** a-f, national (the upper part) and local (the lower part of Beijing) spatial distributions of the estimated 8-hour O<sub>3</sub> concentration average from June 27 to July 2, 2017. The blue arrow is mean ground wind vector (m/s), the color gradient lines in each upper image show the contours of the graphical convolution heatmap, and the gray lines in each below enlarged image show major traffic roads.

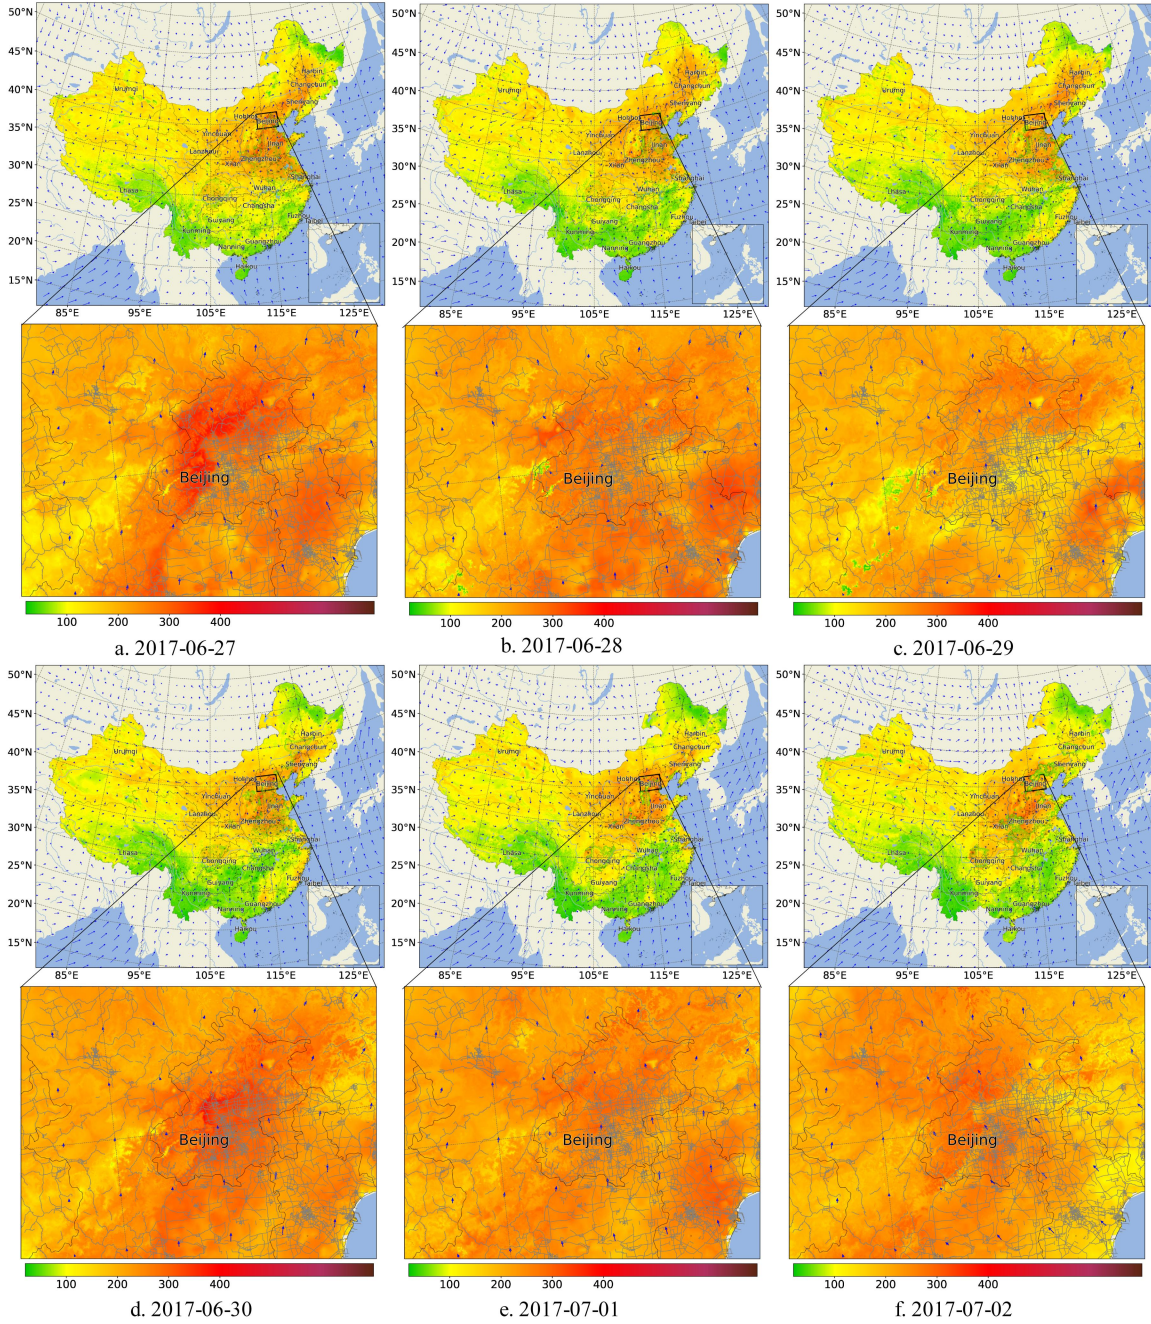



## Supplementary Figure 12

**Spatiotemporal evolution of NO<sub>2</sub> for the haze event in Shanghai of December 19, 2018.** a-f, national (the upper part) and local (the lower part of the Shanghai) spatial distributions of estimated NO<sub>2</sub> concentrations from December 15 to 20, 2018. The blue arrow is mean ground wind vector (m/s), the color gradient lines in each upper image show the contours of the graphical convolution heatmap, and the gray lines in each below enlarged image show major traffic roads.

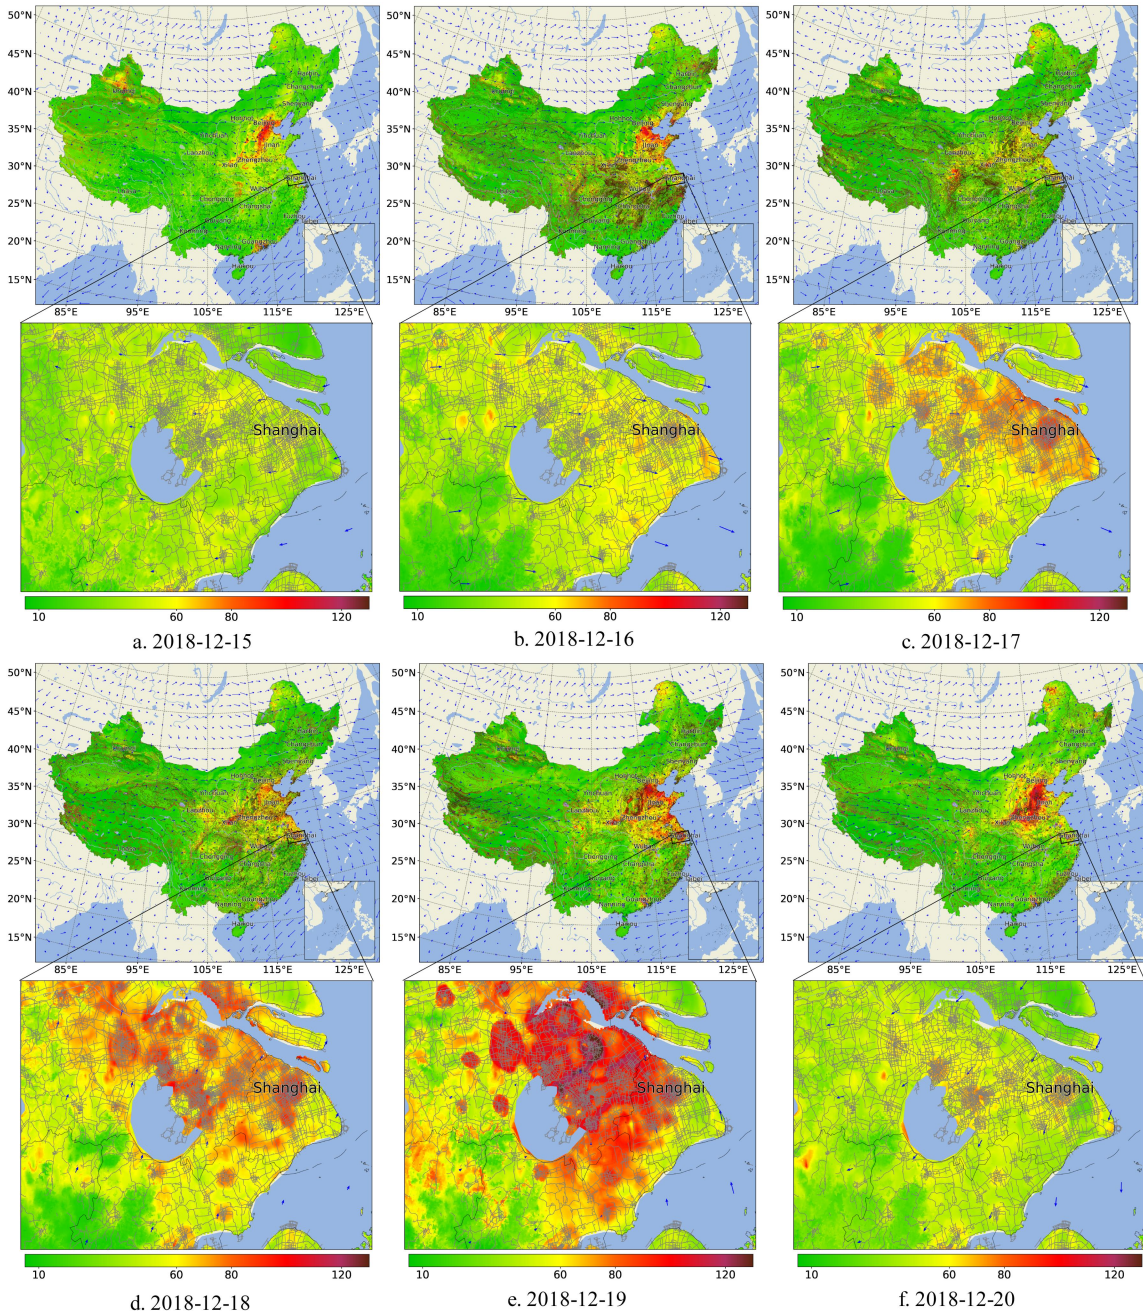

### Supplementary Figure 13

Yearly means of air pollutant concentrations.

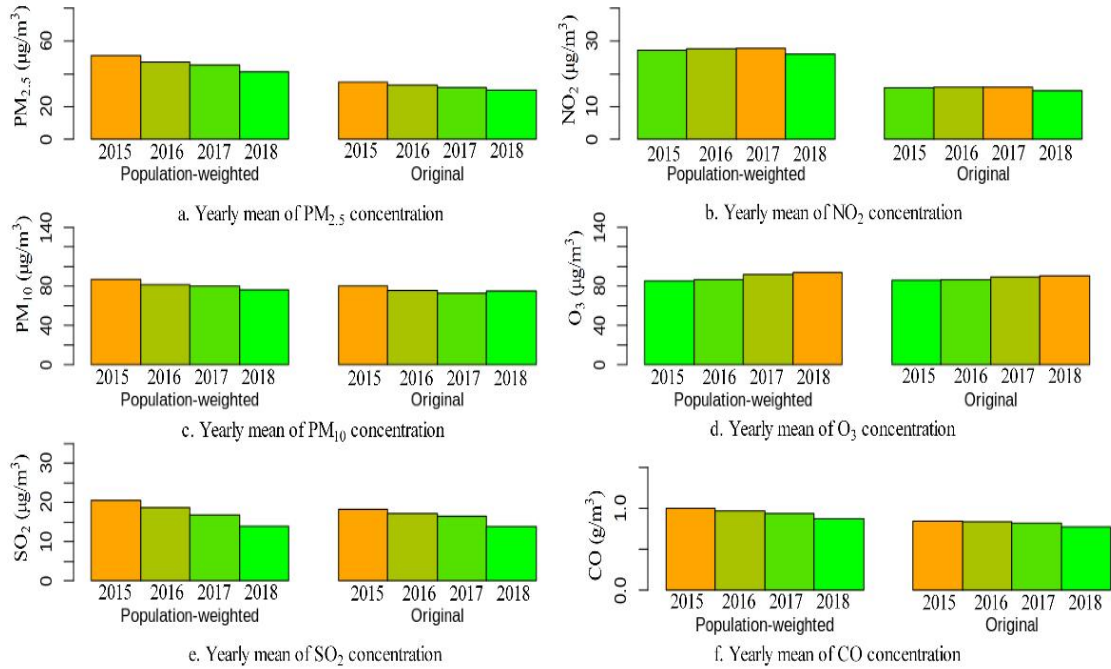

## Supplementary Figure 14

Daily national estimated averages and daily national population-weighted averages of predicted concentrations across mainland China for air pollutants.

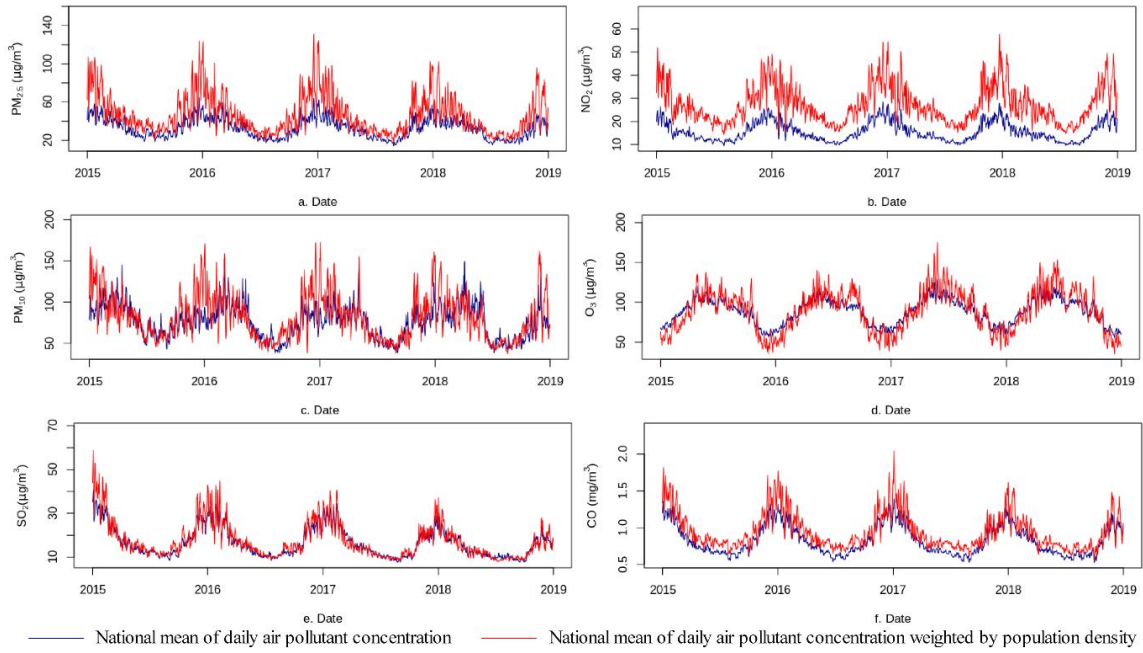



## Supplementary Figure 15

**Monthly mean AQI and its change for each air pollutant from January 2015 to December 2018 in mainland China.** a, b and c:  $PM_{2.5}$ . d, e and f:  $NO_2$ . g, h and i:  $PM_{10}$ . j, k and l:  $O_3A8$ , m, n and o:  $SO_2$ . p, q and r:  $CO$ . a, d, g, j, m and p, monthly mean AQI of January 2015 for each pollutant. b, e, h, k, n and q, monthly mean AQI of December 2018 for each pollutant. c, f, i, l, o and r, change of mean AQI from January 2015 to December 2018 for each pollutant.

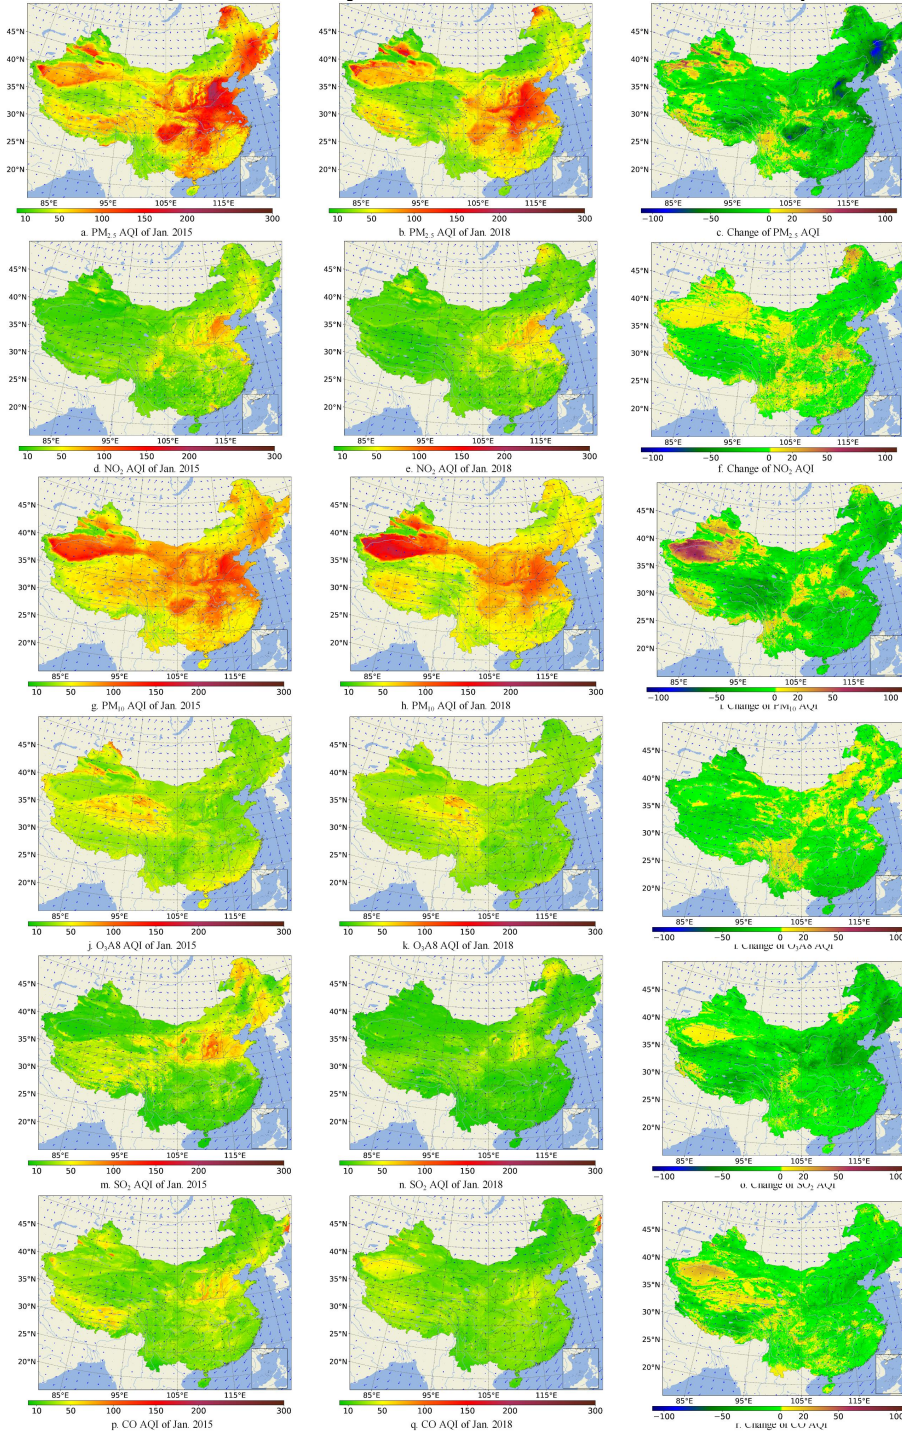



## Supplementary Figure 16

**Monthly mean AQI and its change for each air pollutant from July 2015 to July 2018 in mainland China.** a, b and c, PM<sub>2.5</sub>. d, e and f, NO<sub>2</sub>. g, h and I, PM<sub>10</sub>. j, k and l, O<sub>3</sub>A8. m, n and o, SO<sub>2</sub>. p, q and r, CO. a, d, g, j, m and p, monthly mean AQI of July 2015 for each pollutant. b, e, h, k, n and q: Monthly mean AQI of July 2018 for each pollutant. c, f, i, l, o and r, change of mean AQI from July 2015 to July 2018 for each pollutant.

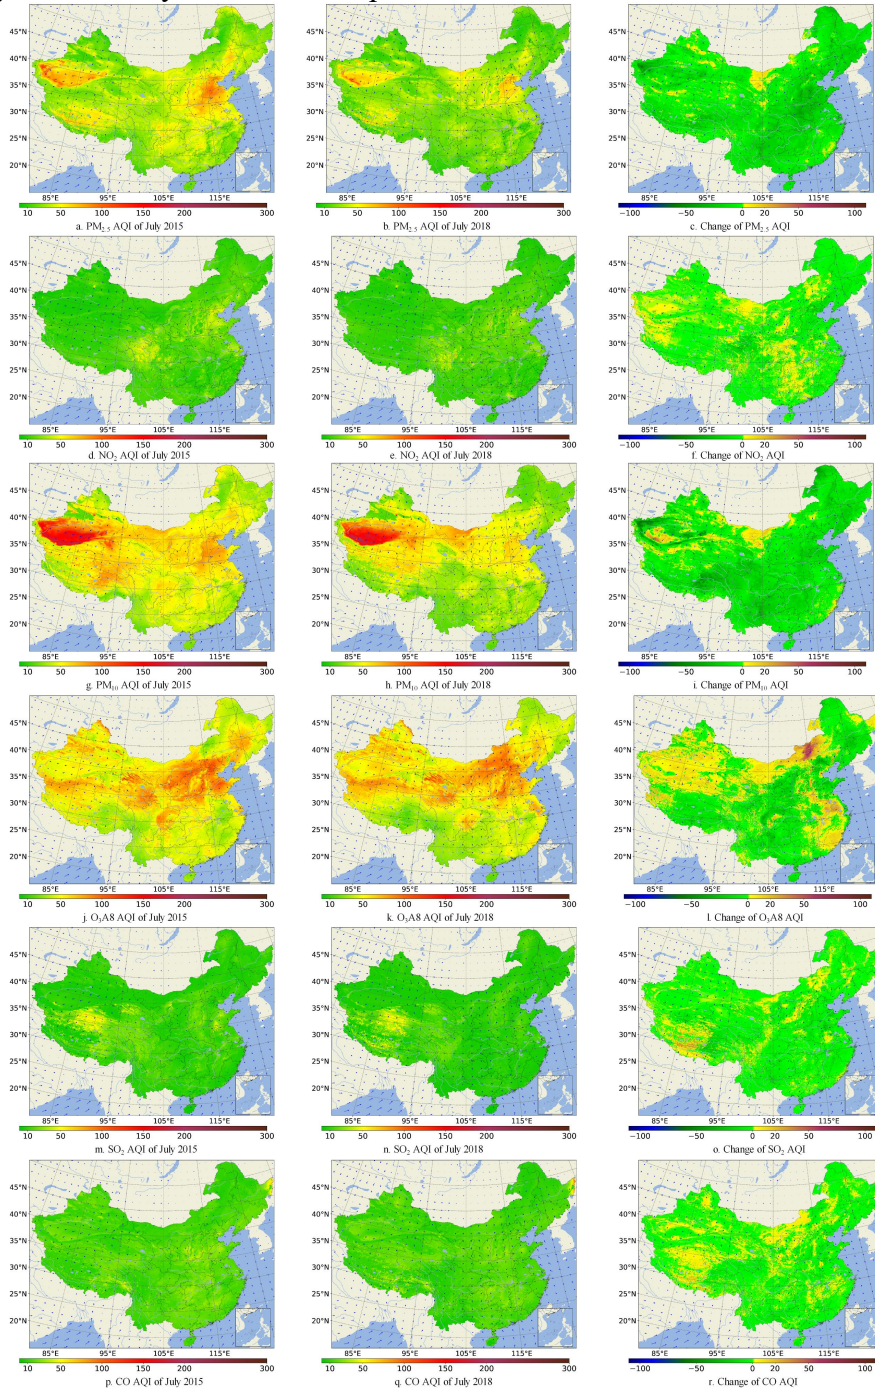

### Supplementary Figure 17

**Summer and winter AQI and primary air pollutant for 2015.** a, mean AQI of July 2015. b, primary air pollutant for mean AQI of July 2015. c, mean AQI of January 2015. d, primary air pollutant for mean AQI of January 2015.

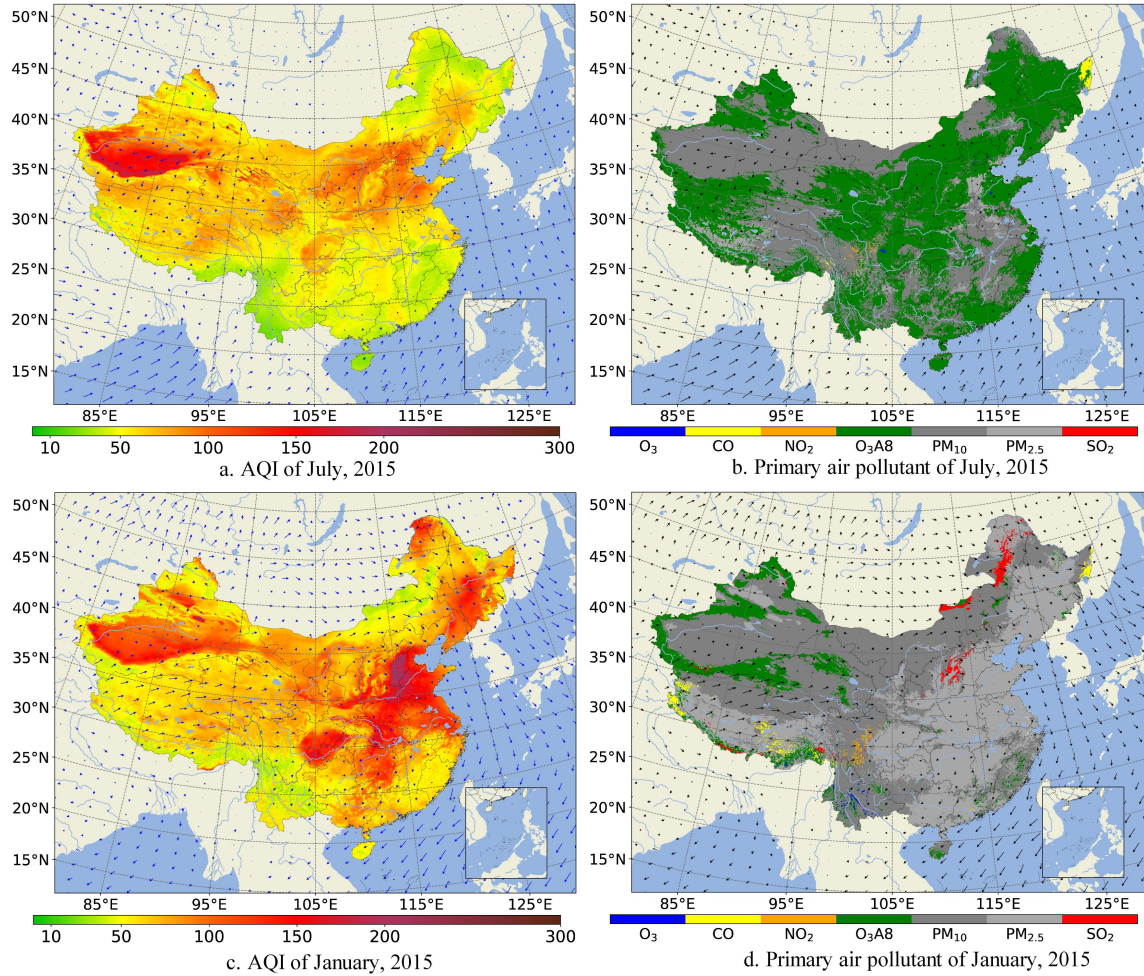



### Supplementary Figure 18

**Summer and winter AQI and primary air pollutant for 2018.** a, mean AQI of July 2018. b, primary air pollutant for mean AQI of July 2018. c, mean AQI of December 2018. d, primary air pollutant for mean AQI of December 2018.

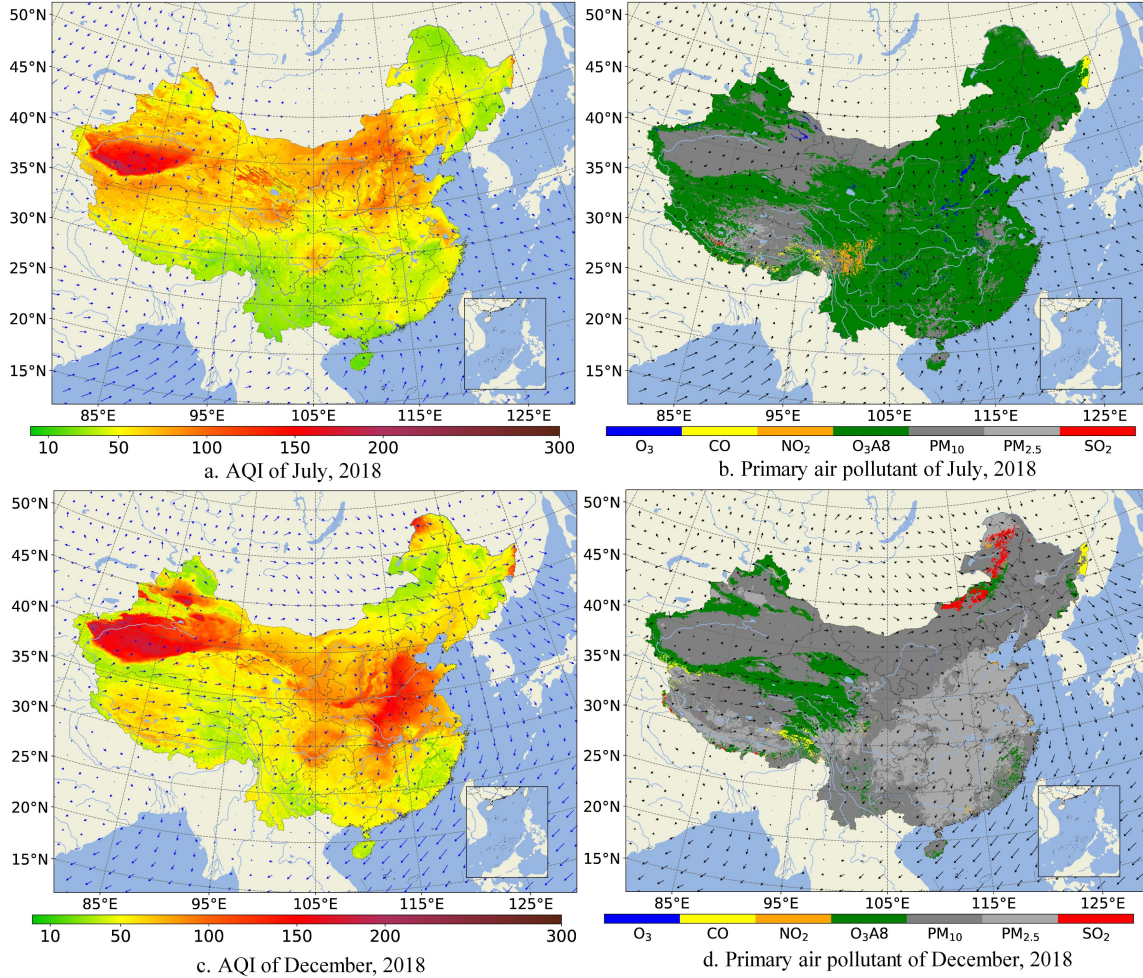

**Supplementary Figure 19**  
**Daily national AQI for mainland China.**

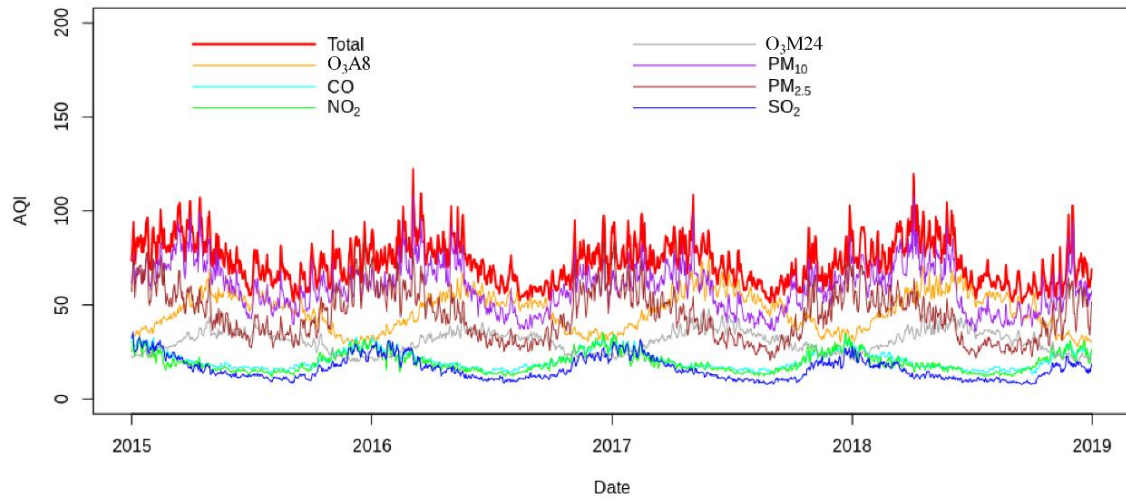

## Supplementary Figure 20

Summer and winter AQI and primary air pollutant for 2015. a, mean AQI of July 2015. b, primary air pollutant for mean.

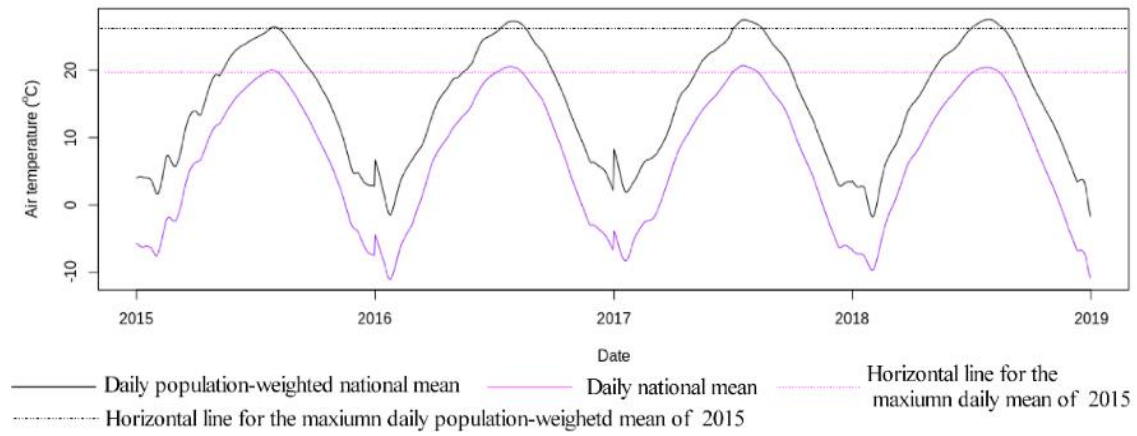

## Supplementary Tables

### Supplementary Table 1

#### Covariates and data sources.

| Class                      | Variable                                              | Unit                               | Description and source                                                                                                                                                                                                                                                                                                                                                                                                              |
|----------------------------|-------------------------------------------------------|------------------------------------|-------------------------------------------------------------------------------------------------------------------------------------------------------------------------------------------------------------------------------------------------------------------------------------------------------------------------------------------------------------------------------------------------------------------------------------|
| Coordinates                | Latitude                                              | °                                  | To capture spatial variability.                                                                                                                                                                                                                                                                                                                                                                                                     |
|                            | Longitude                                             | °                                  | Elevation: Space Shuttle Radar Topology Mission (SRTM)                                                                                                                                                                                                                                                                                                                                                                              |
| Elevation                  | Elevation                                             | meter                              | To capture temporal variability                                                                                                                                                                                                                                                                                                                                                                                                     |
| Time                       | Day of year                                           | -                                  | Derived from MAIAC AOD by PBLH and relative humidity                                                                                                                                                                                                                                                                                                                                                                                |
| Proxy factors              | Ground aerosol coefficient                            | -                                  | From the Dutch-Finnish OMI sensor to capture NO <sub>2</sub> column                                                                                                                                                                                                                                                                                                                                                                 |
|                            | OMI-NO <sub>2</sub>                                   | molec/cm <sup>2</sup>              | To constrain spreading of air pollutants. From NASA GMI. Bottom layer diagnostics (50-60 meters above the ground): Hourly values for a variety of surface-level values, including PM, PM <sub>2.5</sub> , NO, and NO <sub>2</sub> . These will likely provide the most valuable model inputs.                                                                                                                                       |
| PBLH                       | Planetary boundary layer height (PBLH)                | meter                              |                                                                                                                                                                                                                                                                                                                                                                                                                                     |
| MERRA2-GMI                 | Carbon monoxide                                       | mol mol <sup>-1</sup>              | Aerosol diagnostics: Total aerosol extinction on an hourly basis, which may be used for model input (and estimates of surface mass concentrations for black carbon, dust, etc..).<br><br>Daily satellite overpass fields: instantaneous measurements at 10AM and 2PM local time.<br><br>Single-level diagnostics: basic meteorological information such as temperature and humidity at 2m and 10m. These may be useful model inputs |
|                            | Dry deposition of OX                                  | kg m <sup>-2</sup> s <sup>-1</sup> |                                                                                                                                                                                                                                                                                                                                                                                                                                     |
|                            | Dust mass mixing ratio PM <sub>2.5</sub>              | kg kg <sup>-1</sup>                |                                                                                                                                                                                                                                                                                                                                                                                                                                     |
|                            | Nitrate mass mixing ratio                             | kg/kg                              |                                                                                                                                                                                                                                                                                                                                                                                                                                     |
|                            | Nitrogen dioxide                                      | mol mol <sup>-1</sup>              |                                                                                                                                                                                                                                                                                                                                                                                                                                     |
|                            | Ozone                                                 | mol mol <sup>-1</sup>              |                                                                                                                                                                                                                                                                                                                                                                                                                                     |
|                            | Organic carbon mass mixing ratio                      | kg kg <sup>-1</sup>                |                                                                                                                                                                                                                                                                                                                                                                                                                                     |
|                            | Total reconstructed PM <sub>2.5</sub>                 | kg m <sup>-3</sup>                 |                                                                                                                                                                                                                                                                                                                                                                                                                                     |
|                            | Sea salt mass mixing ratio PM <sub>2.5</sub>          | kg kg <sup>-1</sup>                |                                                                                                                                                                                                                                                                                                                                                                                                                                     |
|                            | Black carbon surface mass concentration               | kg m <sup>-3</sup>                 |                                                                                                                                                                                                                                                                                                                                                                                                                                     |
|                            | DMS surface mass concentration                        | kg m <sup>-3</sup>                 |                                                                                                                                                                                                                                                                                                                                                                                                                                     |
|                            | Dust surface mass concentration - PM <sub>2.5</sub>   | kg m <sup>-3</sup>                 |                                                                                                                                                                                                                                                                                                                                                                                                                                     |
|                            | Dust surface mass concentration                       | kg m <sup>-3</sup>                 |                                                                                                                                                                                                                                                                                                                                                                                                                                     |
|                            | Nitric acid surface mass concentration                | kg m <sup>-3</sup>                 |                                                                                                                                                                                                                                                                                                                                                                                                                                     |
|                            | Ammonia surface mass concentration                    | kg m <sup>-3</sup>                 |                                                                                                                                                                                                                                                                                                                                                                                                                                     |
|                            | Ammonium surface mass concentration                   | kg m <sup>-3</sup>                 |                                                                                                                                                                                                                                                                                                                                                                                                                                     |
|                            | Nitrate surface mass concentration                    | kg m <sup>-3</sup>                 |                                                                                                                                                                                                                                                                                                                                                                                                                                     |
|                            | Organic carbon surface mass concentration             | kg m <sup>-3</sup>                 |                                                                                                                                                                                                                                                                                                                                                                                                                                     |
|                            | Total reconstructed PM <sub>2.5</sub>                 | kg m <sup>-3</sup>                 |                                                                                                                                                                                                                                                                                                                                                                                                                                     |
|                            | SO <sub>2</sub> surface mass concentration            | kg m <sup>-3</sup>                 |                                                                                                                                                                                                                                                                                                                                                                                                                                     |
|                            | SO <sub>4</sub> surface mass concentration            | kg m <sup>-3</sup>                 |                                                                                                                                                                                                                                                                                                                                                                                                                                     |
|                            | Sea salt surface mass concentration PM <sub>2.5</sub> | kg m <sup>-3</sup>                 |                                                                                                                                                                                                                                                                                                                                                                                                                                     |
|                            | Total aerosol extinction AOT [550 nm]                 | -                                  |                                                                                                                                                                                                                                                                                                                                                                                                                                     |
|                            | Sulphur dioxide 10am local                            | mol mol <sup>-1</sup>              |                                                                                                                                                                                                                                                                                                                                                                                                                                     |
|                            | Nitrogen dioxide 10am local                           | mol mol <sup>-1</sup>              |                                                                                                                                                                                                                                                                                                                                                                                                                                     |
|                            | Sulphur dioxide 2pm local                             | mol mol <sup>-1</sup>              |                                                                                                                                                                                                                                                                                                                                                                                                                                     |
|                            | Nitrogen dioxide 2pm local                            | mol mol <sup>-1</sup>              |                                                                                                                                                                                                                                                                                                                                                                                                                                     |
|                            | 50-meter eastward wind                                | m s <sup>-1</sup>                  |                                                                                                                                                                                                                                                                                                                                                                                                                                     |
| 10-meter eastward wind     | m s <sup>-1</sup>                                     |                                    |                                                                                                                                                                                                                                                                                                                                                                                                                                     |
| 2-meter eastward wind      | m s <sup>-1</sup>                                     |                                    |                                                                                                                                                                                                                                                                                                                                                                                                                                     |
| 50-meter northward wind    | m s <sup>-1</sup>                                     |                                    |                                                                                                                                                                                                                                                                                                                                                                                                                                     |
| 10-meter northward wind    | m s <sup>-1</sup>                                     |                                    |                                                                                                                                                                                                                                                                                                                                                                                                                                     |
| 2-meter northward wind     | m s <sup>-1</sup>                                     |                                    |                                                                                                                                                                                                                                                                                                                                                                                                                                     |
| 10-meter specific humidity | kg kg <sup>-1</sup>                                   |                                    |                                                                                                                                                                                                                                                                                                                                                                                                                                     |
| 2-meter specific humidity  | kg kg <sup>-1</sup>                                   |                                    |                                                                                                                                                                                                                                                                                                                                                                                                                                     |
| 10-meter air temperature   | °C                                                    |                                    |                                                                                                                                                                                                                                                                                                                                                                                                                                     |
| 2-meter air temperature    | °C                                                    |                                    |                                                                                                                                                                                                                                                                                                                                                                                                                                     |
| Surface skin temperature   | °C                                                    |                                    |                                                                                                                                                                                                                                                                                                                                                                                                                                     |
| total tropospheric ozone   | Dobsons                                               |                                    |                                                                                                                                                                                                                                                                                                                                                                                                                                     |

|                                               |                                           |       |                                                                                                                                                  |
|-----------------------------------------------|-------------------------------------------|-------|--------------------------------------------------------------------------------------------------------------------------------------------------|
| Derived wind variables                        | Vertical stagnation of wind speed         | m/s   | $w_{stag} = \left( \sqrt{u_{50}^2 + v_{50}^2} - \sqrt{u_{10}^2 + v_{10}^2} \right)_6$ ,<br>derived from wind speeds of single-level diagnostics. |
|                                               | Wind shear/mechanical mixing              | m/s   | $w_{stag} = \left( \sqrt{u_{10}^2 + v_{10}^2} - \sqrt{u_2^2 + v_2^2} \right)_6$ ,<br>derived from wind speeds of single-level diagnostics.       |
| High-resolution meteorology                   | Air temperature                           | °C    | High-resolution spatiotemporal interpolation <sup>7,8</sup> .                                                                                    |
|                                               | Air pressure                              | hPa   |                                                                                                                                                  |
|                                               | Relative humidity                         | %     |                                                                                                                                                  |
|                                               | Wind speed                                | m/s   |                                                                                                                                                  |
|                                               | Precipitation                             | mm    |                                                                                                                                                  |
| For traffic-related NO <sub>2</sub> Greenness | Roadway length within the buffer of 10 km | meter | Extracted from the open street traffic network.                                                                                                  |
|                                               | NDVI                                      | -     | average NDVI from NASA's Aqua and Terra satellite.                                                                                               |
| An indirect indicator                         | Is workday?                               | -     | As an indirect indicator of air pollutants.                                                                                                      |

Note: The variables including the MERRA2-GMI input of pollutants (shown in gray background) were not used in our sensitivity analysis.



## Supplementary Table 2

### Hyperparameters tested in the sensitivity analysis for the compared machine learning or statistical regression methods.

| Algorithm           | Description                                                                                                                                                                                                                                                                 | Hyperparameters (value range; step) or (value setup)                                                                                                                                                                                                     |
|---------------------|-----------------------------------------------------------------------------------------------------------------------------------------------------------------------------------------------------------------------------------------------------------------------------|----------------------------------------------------------------------------------------------------------------------------------------------------------------------------------------------------------------------------------------------------------|
| DGM (no MERRA2 GMI) | Our physics-inspired graph hybrid model (no MERRA2 GMI used): a hybrid system of local graph convolutions, full residual connections and attention layers, with the soft constraint of mass conservation.                                                                   | Number of neighbors (4-30; 2), number of graph convolutions (1-10; 1), numbers of hidden encoding layers (1-20; 1), number of attention layers (1-8; 1); learning rate (0.001-0.2; 0.01), and mini batch size (256-4096; 256)                            |
| FRE                 | Full residual encoder-decoder: a neural network of multilayer perceptron with full residual connections, as a general nonlinear approximator of any continuous functions.                                                                                                   | Numbers of hidden layers (1-20; 1), number of attention layers (1-10; 1); learning rate (0.001-0.2; 0.01), and mini batch size (256-4096; 256)                                                                                                           |
| SAGE                | GraphSAGE: a stochastic generalization of graph convolutions, especially useful for massive, dynamic graphs that contain rich feature information. It has the same network topology as local graph convolution in our DGM method.                                           | Number of neighbors (4-30), number of graph convolutions (1-10); learning rate (0.001-0.2), and mini batch size (256-4096)                                                                                                                               |
| RF                  | Random forest: a method of averaging multiple deep decision trees, trained on different parts of the same training set, with the goal of reducing the variance.                                                                                                             | Number of trees (50-500; 50), criterion (mse), min samples split (1-10; 2), bootstrap (True, False), max feature ('auto')                                                                                                                                |
| XGB                 | XGBoost: an optimized distributed gradient boosting library designed to be highly efficient, flexible and portable. It is run under the gradient boosting framework.                                                                                                        | Booster (gbtree, gblinear), number of trees (50-500; 50), learning rate (0-1; 0.02), max depth (3-10; 1), min child weight (0-2; 0.3), lambda (0-1; 0.2), alpha (0-1; 0.2), tree method ('auto')                                                         |
| Kri <sup>a</sup>    | Ordinary kriging: estimates a value at a point of a region for which a variogram is known, using data in the neighborhood of the estimation location. With local second-order stationarity, it implicitly evaluates the mean in a moving neighborhood.                      | Semivariogram fitting: model (stable, circular, spherical, exponential, Gaussian), anisotropy (No), partial sill (True), number of lags (6-20; 2); search neighborhood: max neighbors (3-16; 2), min neighbors (2-6; 1).                                 |
| RKrig               | Regression kriging: combines a regression model with simple kriging of the regression residuals. The experimental variogram of residuals is first modeled, and then simple kriging (SK) is applied to the residuals to give the spatial prediction of the residuals.        | Regression model: multilinear regression (MLR); kriging of the residuals from the MLR: ordinary kriging that also tested its similar hyperparameters including variogram models (model and number of lags), search neighborhood (min and max neighbors)  |
| GAM                 | Generalized additive model: a generalized additive model in which the linear response variable depends linearly on unknown smooth functions of some predictor variables. It was originally developed to blend properties of generalized linear models with additive models. | Smoothing basis (cr: cubic regression spline), link function (normal distribution), optimizing hyperparameters ("auto"): InitialLearnRateForPredictors, NumTreesPerPredictor, Interactions, InitialLearnRateForInteractions, and NumTreesPerInteraction. |

<sup>a</sup> No covariates used for ordinary kriging; all the same covariates used for all the other methods.

### Supplementary Table 3

#### Mean R<sup>2</sup> of different methods across seven air pollutants.

| Method                         | Type         | PM <sub>2.5</sub> | NO <sub>2</sub> | PM <sub>10</sub> | O <sub>3</sub> A8 | O <sub>3</sub> M24 | SO <sub>2</sub> | CO   |
|--------------------------------|--------------|-------------------|-----------------|------------------|-------------------|--------------------|-----------------|------|
| DGM                            | Training     | 0.93              | 0.93            | 0.92             | 0.88              | 0.85               | 0.85            | 0.83 |
|                                | Testing      | 0.88              | 0.78            | 0.86             | 0.81              | 0.76               | 0.73            | 0.70 |
|                                | Ind. testing | 0.87              | 0.72            | 0.85             | 0.78              | 0.73               | 0.63            | 0.58 |
| DGM (No MERRA2-GMI pollutants) | Training     | 0.92              | 0.94            | 0.93             | 0.88              | 0.81               | 0.84            | 0.80 |
|                                | Testing      | 0.88              | 0.77            | 0.86             | 0.80              | 0.71               | 0.73            | 0.69 |
| FRE                            | Training     | 0.93              | 0.93            | 0.92             | 0.90              | 0.84               | 0.86            | 0.84 |
|                                | Testing      | 0.81              | 0.70            | 0.81             | 0.73              | 0.70               | 0.68            | 0.64 |
|                                | Ind. testing | 0.72              | 0.59            | 0.71             | 0.70              | 0.66               | 0.57            | 0.54 |
| SAGE                           | Training     | 0.68              | 0.67            | 0.68             | 0.67              | 0.63               | 0.57            | 0.57 |
|                                | Testing      | 0.67              | 0.62            | 0.66             | 0.66              | 0.62               | 0.54            | 0.52 |
|                                | Ind. testing | 0.66              | 0.59            | 0.65             | 0.65              | 0.61               | 0.53            | 0.49 |
| RF                             | Training     | 0.94              | 0.93            | 0.94             | 0.94              | 0.93               | 0.92            | 0.92 |
|                                | Testing      | 0.78              | 0.71            | 0.76             | 0.74              | 0.72               | 0.74            | 0.67 |
|                                | Ind. testing | 0.77              | 0.56            | 0.75             | 0.70              | 0.68               | 0.58            | 0.50 |
| XGB                            | Training     | 0.68              | 0.68            | 0.64             | 0.65              | 0.63               | 0.62            | 0.57 |
|                                | Testing      | 0.67              | 0.67            | 0.64             | 0.65              | 0.62               | 0.62            | 0.56 |
|                                | Ind. testing | 0.66              | 0.59            | 0.61             | 0.62              | 0.59               | 0.54            | 0.41 |
| Krig                           | Training     | -                 | -               | -                | -                 | -                  | -               | -    |
|                                | Testing      | 0.55              | 0.46            | 0.56             | 0.51              | 0.50               | 0.48            | 0.45 |
|                                | Ind. testing | 0.55              | 0.41            | 0.54             | 0.49              | 0.48               | 0.46            | 0.42 |
| RKrig                          | Training     | -                 | -               | -                | -                 | -                  | -               | -    |
|                                | Testing      | 0.70              | 0.67            | 0.71             | 0.69              | 0.65               | 0.62            | 0.61 |
|                                | Ind. testing | 0.72              | 0.62            | 0.70             | 0.68              | 0.66               | 0.60            | 0.56 |
| GAM                            | Training     | 0.53              | 0.53            | 0.42             | 0.55              | 0.49               | 0.34            | 0.37 |
|                                | Testing      | 0.53              | 0.53            | 0.41             | 0.54              | 0.50               | 0.34            | 0.36 |
|                                | Ind. testing | 0.54              | 0.54            | 0.46             | 0.54              | 0.49               | 0.30            | 0.35 |

Method: Deep graph modeling proposed in this paper (DGM); Full residual encoder-decoder (FRE); GraphSAGE (SAGE); Random forest (RF); XGBoost (XGB); Kriging (Krig); Regression kriging (RKrig); Generalized additive model (GAM). Ind. testing: independent testing. Air pollutants: PM<sub>2.5</sub>: Fine inhalable particles, with diameters that are generally 2.5 micrometers and smaller; NO<sub>2</sub>: Nitrogen dioxide; PM<sub>10</sub>: Inhalable particles, with diameters that are generally 10 micrometers and smaller; O<sub>3</sub>A8: 8-hour average of O<sub>3</sub>; O<sub>3</sub>M24: Hourly maximum of daily O<sub>3</sub>; SO<sub>2</sub>: Sulfur dioxide; CO: Carbon monoxide.

## Supplementary Table 4

### Mean RMSE for different methods across seven air pollutants.

| Method<br>Unit                           | Type         | PM <sub>2.5</sub><br>µg/m <sup>3</sup> | NO <sub>2</sub><br>µg/m <sup>3</sup> | PM <sub>10</sub><br>µg/m <sup>3</sup> | O <sub>3</sub> A8<br>µg/m <sup>3</sup> | O <sub>3</sub> M24<br>µg/m <sup>3</sup> | SO <sub>2</sub><br>µg/m <sup>3</sup> | CO<br>mg/m <sup>3</sup> |
|------------------------------------------|--------------|----------------------------------------|--------------------------------------|---------------------------------------|----------------------------------------|-----------------------------------------|--------------------------------------|-------------------------|
| DGM                                      | Training     | 9.41                                   | 6.58                                 | 16.05                                 | 15.81                                  | 20.44                                   | 8.71                                 | 0.24                    |
|                                          | Testing      | 12.66                                  | 9.14                                 | 21.90                                 | 20.23                                  | 26.07                                   | 11.72                                | 0.31                    |
|                                          | Ind. testing | 13.42                                  | 11.53                                | 21.96                                 | 21.47                                  | 27.58                                   | 12.37                                | 0.37                    |
| DGM (No<br>MERRA2-<br>GMI<br>pollutants) | Training     | 9.47                                   | 6.13                                 | 16.01                                 | 15.93                                  | 22.69                                   | 8.79                                 | 0.25                    |
|                                          | Testing      | 12.76                                  | 9.15                                 | 22.13                                 | 20.50                                  | 28.42                                   | 11.49                                | 0.32                    |
|                                          | Ind. testing | 13.41                                  | 11.69                                | 21.92                                 | 21.86                                  | 29.03                                   | 12.67                                | 0.38                    |
| FRE                                      | Training     | 9.65                                   | 5.11                                 | 16.01                                 | 14.73                                  | 21.14                                   | 8.55                                 | 0.24                    |
|                                          | Testing      | 15.46                                  | 10.63                                | 24.94                                 | 25.79                                  | 28.63                                   | 12.17                                | 0.34                    |
|                                          | Ind. testing | 16.89                                  | 13.51                                | 30.24                                 | 26.41                                  | 30.48                                   | 13.41                                | 0.39                    |
| SAGE                                     | Training     | 20.45                                  | 11.15                                | 33.24                                 | 27.03                                  | 32.19                                   | 13.40                                | 0.37                    |
|                                          | Testing      | 20.58                                  | 11.89                                | 33.36                                 | 27.48                                  | 32.73                                   | 13.69                                | 0.39                    |
|                                          | Ind. testing | 20.78                                  | 12.49                                | 33.51                                 | 27.43                                  | 32.18                                   | 13.77                                | 0.41                    |
| RF                                       | Training     | 8.82                                   | 5.19                                 | 14.65                                 | 12.62                                  | 14.28                                   | 5.88                                 | 0.17                    |
|                                          | Testing      | 17.22                                  | 10.45                                | 28.61                                 | 25.22                                  | 28.30                                   | 11.35                                | 0.33                    |
|                                          | Ind. testing | 17.60                                  | 13.05                                | 28.45                                 | 26.91                                  | 29.88                                   | 13.11                                | 0.40                    |
| XGB                                      | Training     | 20.75                                  | 10.97                                | 34.77                                 | 29.37                                  | 32.40                                   | 13.61                                | 0.38                    |
|                                          | Testing      | 21.02                                  | 11.09                                | 35.32                                 | 29.69                                  | 32.75                                   | 13.74                                | 0.38                    |
|                                          | Ind. testing | 21.69                                  | 12.49                                | 35.47                                 | 30.63                                  | 33.60                                   | 13.76                                | 0.41                    |
| Krig                                     | Training     | -                                      | -                                    | -                                     | -                                      | -                                       | -                                    | -                       |
|                                          | Testing      | 22.5                                   | 15.03                                | 37.23                                 | 37.41                                  | 42.13                                   | 15.53                                | 0.45                    |
|                                          | Ind. testing | 22.6                                   | 17.01                                | 38.10                                 | 38.61                                  | 43.02                                   | 15.81                                | 0.49                    |
| RKrig                                    | Training     | -                                      | -                                    | -                                     | -                                      | -                                       | -                                    | -                       |
|                                          | Testing      | 19.01                                  | 11.13                                | 30.41                                 | 25.42                                  | 33.23                                   | 13.23                                | 0.40                    |
|                                          | Ind. testing | 18.46                                  | 12.08                                | 30.03                                 | 25.92                                  | 32.97                                   | 13.89                                | 0.37                    |
| GAM                                      | Training     | 27.40                                  | 13.42                                | 57.92                                 | 31.31                                  | 37.62                                   | 20.13                                | 0.51                    |
|                                          | Testing      | 27.18                                  | 13.46                                | 59.77                                 | 31.36                                  | 37.63                                   | 20.00                                | 0.52                    |
|                                          | Ind. testing | 26.83                                  | 13.64                                | 47.08                                 | 31.33                                  | 37.52                                   | 19.33                                | 0.53                    |

Method: Deep graph modeling proposed in this paper (DGM); Full residual encoder-decoder (FRE); GraphSAGE (SAGE); Random forest (RF); XGBoost (XGB); Kriging (Krig); Regression kriging (RKrig); Generalized additive model (GAM). Ind. testing: independent testing. Air pollutants: PM<sub>2.5</sub>: Fine inhalable particles, with diameters that are generally 2.5 micrometers and smaller; NO<sub>2</sub>: Nitrogen dioxide; PM<sub>10</sub>: Inhalable particles, with diameters that are generally 10 micrometers and smaller; O<sub>3</sub>A8: 8-hour average of O<sub>3</sub>; O<sub>3</sub>M24: Hourly maximum of daily O<sub>3</sub>; SO<sub>2</sub>: Sulfur dioxide; CO: Carbon monoxide.

### Supplementary Table 5

#### Mean RMSE for the $e^2$ and the total loss terms of seven air pollutants.

| Loss type  | PM <sub>2.5</sub><br>μg/m <sup>3</sup> | NO <sub>2</sub><br>μg/m <sup>3</sup> | PM <sub>10</sub><br>μg/m <sup>3</sup> | O <sub>3</sub> A8<br>μg/m <sup>3</sup> | O <sub>3</sub> M24<br>μg/m <sup>3</sup> | SO <sub>2</sub><br>μg/m <sup>3</sup> | CO<br>mg/m <sup>3</sup> |
|------------|----------------------------------------|--------------------------------------|---------------------------------------|----------------------------------------|-----------------------------------------|--------------------------------------|-------------------------|
| Total loss | 9.41                                   | 6.58                                 | 16.05                                 | 15.81                                  | 20.44                                   | 8.71                                 | 0.24                    |
| $e_2$      | 0.037                                  | 0.056                                | 0.053                                 | 0.094                                  | 0.134                                   | 2.33E-4                              | 1.62E-5                 |

### Supplementary Table 6

**Increase in variance ( $R^2$ ) and decrease in RMSE by our DGM in comparison with representative machine learning methods for criteria air pollutants.**

| Metric         | Type                     | PM <sub>2.5</sub><br>µg/m <sup>3</sup> | NO <sub>2</sub><br>µg/m <sup>3</sup> | PM <sub>10</sub><br>µg/m <sup>3</sup> | O <sub>3</sub> A8<br>µg/m <sup>3</sup> | O <sub>3</sub> M24<br>µg/m <sup>3</sup> | SO <sub>2</sub><br>µg/m <sup>3</sup> | CO<br>mg/m <sup>3</sup> |
|----------------|--------------------------|----------------------------------------|--------------------------------------|---------------------------------------|----------------------------------------|-----------------------------------------|--------------------------------------|-------------------------|
| R <sup>2</sup> | Increase range           | 0.10-0.33                              | 0.10-0.31                            | 0.10-0.39                             | 0.08-0.29                              | 0.05-0.25                               | 0.03-0.33                            | 0.02-0.23               |
|                | Mean increase            | 0.21                                   | 0.16                                 | 0.22                                  | 0.15                                   | 0.13                                    | 0.11                                 | 0.11                    |
|                | Increase percentage      | 13-61%                                 | 16-76%                               | 13-85%                                | 11-59%                                 | 7-52%                                   | 5-110%                               | 4-66%                   |
|                | Mean increase percentage | 34%                                    | 31%                                  | 38%                                   | 27%                                    | 25%                                     | 30%                                  | 27%                     |
| RMSE           | Decrease range           | 3.47-13.41                             | 0.55-5.48                            | 6.49-25.12                            | 4.45-17.14                             | 2.30-15.44                              | 0.74-6.96                            | 0.00-0.16               |
|                | Mean decrease            | 7.28                                   | 1.93                                 | 12.73                                 | 8.14                                   | 6.66                                    | 2.34                                 | 0.06                    |
|                | Decrease percentage      | 21-50%                                 | 5-32%                                | 23-53%                                | 17-44%                                 | 8-36%                                   | 6-36%                                | 0-30%                   |
|                | Mean decrease percentage | 34%                                    | 13%                                  | 35%                                   | 26%                                    | 18%                                     | 15%                                  | 12%                     |

### Supplementary Table 7

**Comparison of RMSE for the temporal trends: summarized monthly means of air pollutants for all sites in the site-based independent test.**

| Type          | PM <sub>2.5</sub><br>µg/m <sup>3</sup> | NO <sub>2</sub><br>µg/m <sup>3</sup> | PM <sub>10</sub><br>µg/m <sup>3</sup> | O <sub>3</sub> A8<br>µg/m <sup>3</sup> | SO <sub>2</sub><br>µg/m <sup>3</sup> | CO<br>mg/m <sup>3</sup> |
|---------------|----------------------------------------|--------------------------------------|---------------------------------------|----------------------------------------|--------------------------------------|-------------------------|
| DGM           | 0.79                                   | 1.26                                 | 1.61                                  | 1.74                                   | 1.16                                 | 0.024                   |
| FRE           | 3.60                                   | 2.18                                 | 4.68                                  | 5.03                                   | 2.67                                 | 0.065                   |
| SAGE          | 3.05                                   | 2.41                                 | 3.83                                  | 3.91                                   | 1.77                                 | 0.049                   |
| XGBoost       | 3.92                                   | 2.74                                 | 6.06                                  | 5.43                                   | 2.31                                 | 0.064                   |
| Random forest | 3.05                                   | 2.40                                 | 3.83                                  | 3.91                                   | 1.76                                 | 0.049                   |

**Supplementary Table 8****Comparison of the point estimates, grid mean estimates and MERRA2-GMI related variables.**

| MERRA2-GMI/Satellite variables              | Source                    | Unit                  | Cor.  | Pol.               | Model prediction              | Cor. <sup>a</sup> | R <sup>2b</sup> |
|---------------------------------------------|---------------------------|-----------------------|-------|--------------------|-------------------------------|-------------------|-----------------|
| Total reconstructed PM <sub>2.5</sub>       | Aerosol diagnostics       | kg m <sup>-3</sup>    | 0.50  | PM <sub>2.5</sub>  | Point estimate                | 0.93              | 0.87            |
| Total reconstructed PM <sub>2.5</sub>       | Bottom layer diagnostics  | kg m <sup>-3</sup>    | 0.51  | PM <sub>2.5</sub>  | 1x1 km <sup>2</sup> grid mean | 0.82              | 0.72            |
| NO <sub>2</sub>                             | Bottom layer diagnostics  | mol mol <sup>-1</sup> | 0.53  | NO <sub>2</sub>    | Point estimate                | 0.85              | 0.72            |
| NO <sub>2</sub> (average over 10am and 2pm) | Satellite overpass fields | mol mol <sup>-1</sup> | 0.41  | NO <sub>2</sub>    | 1x1 km <sup>2</sup> grid mean | 0.72              | 0.51            |
| OMI-NO <sub>2</sub>                         | Aura OMI                  | mol cm <sup>-2</sup>  | 0.18  | PM <sub>10</sub>   | Point estimate                | 0.92              | 0.85            |
| Total reconstructed PM                      | Bottom layer diagnostics  | mol mol <sup>-1</sup> | 0.36  | PM <sub>10</sub>   | 1x1 km <sup>2</sup> grid mean | 0.83              | 0.68            |
| MAIAC AOD                                   | MODIS Terra/Aqua          | -                     | 0.22  | O <sub>3</sub> A8  | Point estimate                | 0.89              | 0.78            |
| Total tropospheric O <sub>3</sub>           | Single-level diagnostics  | dobsons               | 0.005 | O <sub>3</sub> A8  | 1x1 km <sup>2</sup> grid mean | 0.75              | 0.57            |
| O <sub>3</sub> (average over 10am and 2pm)  | Satellite overpass fields | mol mol <sup>-1</sup> | 0.35  | O <sub>3</sub> M24 | Point estimate                | 0.85              | 0.73            |
|                                             |                           |                       |       |                    | 1x1 km <sup>2</sup> grid mean | 0.7               | 0.46            |
| SO <sub>2</sub> surface mass concentration  | Aerosol diagnostics       | kg m <sup>-3</sup>    | 0.15  | SO <sub>2</sub>    | Point estimate                | 0.79              | 0.63            |
| SO <sub>2</sub> (average over 10am and 2pm) | Satellite overpass fields | mol mol <sup>-1</sup> | 0.17  |                    | 1x1 km <sup>2</sup> grid mean | 0.71              | 0.49            |
| CO                                          | Bottom layer diagnostics  | mol mol <sup>-1</sup> | 0.22  | CO                 | Point estimate                | 0.76              | 0.57            |

<sup>a</sup>Cor.: Pearson correlation with the ground observed values; <sup>b</sup>R<sup>2</sup> between estimates and observed values.

**Supplementary Table 9****Seasonal performance metrics (R<sup>2</sup> and RMSE) for the site-based independent test.**

| Year        | Season                     | PM <sub>2.5</sub> |       | PM <sub>10</sub> |       | NO <sub>2</sub> |       | O <sub>3</sub> A8 |       | SO <sub>2</sub> |       | CO             |      |
|-------------|----------------------------|-------------------|-------|------------------|-------|-----------------|-------|-------------------|-------|-----------------|-------|----------------|------|
|             |                            | R <sup>2</sup>    | RMSE  | R <sup>2</sup>   | RMSE  | R <sup>2</sup>  | RMSE  | R <sup>2</sup>    | RMSE  | R <sup>2</sup>  | RMSE  | R <sup>2</sup> | RMSE |
| 2015        | Spring (AMJ <sup>a</sup> ) | 0.76              | 13.35 | 0.77             | 23.44 | 0.53            | 10.73 | 0.53              | 32.83 | 0.36            | 13.81 | 0.36           | 0.40 |
|             | Summer (JAS <sup>b</sup> ) | 0.73              | 11.73 | 0.73             | 19.12 | 0.51            | 9.84  | 0.59              | 29.51 | 0.28            | 12.47 | 0.37           | 0.35 |
|             | Autumn (OND <sup>c</sup> ) | 0.85              | 18.97 | 0.83             | 27.91 | 0.63            | 13.24 | 0.72              | 21.50 | 0.60            | 17.10 | 0.60           | 0.44 |
|             | Winter (JFM <sup>d</sup> ) | 0.85              | 17.40 | 0.83             | 27.93 | 0.63            | 13.52 | 0.51              | 23.81 | 0.63            | 21.33 | 0.48           | 0.56 |
| 2016        | Spring (AMJ)               | 0.77              | 10.73 | 0.79             | 22.35 | 0.62            | 10.06 | 0.60              | 27.61 | 0.46            | 10.92 | 0.46           | 0.36 |
|             | Summer (JAS)               | 0.78              | 9.19  | 0.73             | 16.29 | 0.56            | 9.41  | 0.68              | 25.91 | 0.35            | 9.60  | 0.45           | 0.31 |
|             | Autumn (OND)               | 0.89              | 14.96 | 0.86             | 24.26 | 0.76            | 11.21 | 0.76              | 16.29 | 0.67            | 14.00 | 0.59           | 0.42 |
|             | Winter (JFM)               | 0.82              | 18.68 | 0.83             | 28.69 | 0.66            | 12.38 | 0.61              | 21.12 | 0.63            | 17.10 | 0.56           | 0.45 |
| 2017        | Spring (AMJ)               | 0.84              | 9.24  | 0.85             | 20.71 | 0.67            | 9.47  | 0.82              | 20.75 | 0.51            | 8.06  | 0.43           | 0.30 |
|             | Summer (JAS)               | 0.82              | 7.37  | 0.79             | 14.08 | 0.62            | 8.43  | 0.82              | 20.02 | 0.43            | 7.28  | 0.53           | 0.26 |
|             | Autumn (OND)               | 0.90              | 12.54 | 0.87             | 20.34 | 0.79            | 10.63 | 0.82              | 14.18 | 0.60            | 11.01 | 0.63           | 0.32 |
|             | Winter (JFM)               | 0.89              | 16.17 | 0.86             | 24.52 | 0.76            | 11.23 | 0.70              | 18.01 | 0.69            | 14.25 | 0.62           | 0.40 |
| 2018        | Spring (AMJ)               | 0.84              | 8.16  | 0.87             | 19.49 | 0.67            | 8.99  | 0.85              | 18.26 | 0.46            | 7.00  | 0.46           | 0.24 |
|             | Summer (JAS)               | 0.76              | 6.43  | 0.74             | 12.07 | 0.61            | 7.24  | 0.83              | 17.85 | 0.38            | 6.02  | 0.44           | 0.23 |
|             | Autumn (OND)               | 0.91              | 10.61 | 0.90             | 18.83 | 0.78            | 9.47  | 0.89              | 12.56 | 0.58            | 8.16  | 0.61           | 0.29 |
|             | Winter (JFM)               | 0.90              | 13.34 | 0.88             | 21.50 | 0.77            | 10.46 | 0.82              | 14.04 | 0.60            | 12.06 | 0.61           | 0.32 |
| All seasons | 2015                       | 0.85              | 15.67 | 0.83             | 24.91 | 0.60            | 12.86 | 0.66              | 27.32 | 0.59            | 16.61 | 0.51           | 0.46 |
|             | 2016                       | 0.86              | 14.02 | 0.84             | 23.38 | 0.65            | 11.84 | 0.73              | 23.08 | 0.63            | 13.36 | 0.55           | 0.41 |
|             | 2017                       | 0.90              | 11.72 | 0.87             | 20.18 | 0.71            | 10.88 | 0.85              | 18.42 | 0.66            | 10.21 | 0.60           | 0.34 |
|             | 2018                       | 0.91              | 9.99  | 0.89             | 18.35 | 0.71            | 9.95  | 0.88              | 15.90 | 0.60            | 8.66  | 0.59           | 0.28 |

Note: <sup>a</sup>. April, May and June; <sup>b</sup>. July, August and September; <sup>c</sup>. October, November and December; <sup>d</sup>. January, February and March.



## Supplementary Table 10

### Seasonal performance metrics (Pearson's correlation and mean bias) for the site-based independent test.

| Year        | Season                    | PM <sub>2.5</sub> |                 | PM <sub>10</sub> |       | NO <sub>2</sub> |       | O <sub>3</sub> A8 |       | SO <sub>2</sub> |       | CO   |         |
|-------------|---------------------------|-------------------|-----------------|------------------|-------|-----------------|-------|-------------------|-------|-----------------|-------|------|---------|
|             |                           | Cor. <sup>a</sup> | MB <sup>b</sup> | Cor.             | MB    | Cor.            | MB    | Cor.              | MB    | Cor.            | MB    | Cor. | MB      |
| 2015        | Spring (AMJ) <sup>c</sup> | 0.87              | -0.96           | 0.88             | -1.13 | 0.71            | -1.72 | 0.73              | -2.86 | 0.59            | -1.81 | 0.59 | -0.036  |
|             | Summer (JAS) <sup>d</sup> | 0.86              | -0.77           | 0.86             | -0.35 | 0.70            | -1.34 | 0.77              | -2.28 | 0.52            | -1.59 | 0.61 | -0.017  |
|             | Autumn (OND) <sup>e</sup> | 0.93              | -0.77           | 0.91             | -1.41 | 0.76            | -1.88 | 0.85              | -0.98 | 0.77            | -1.82 | 0.76 | 0.006   |
|             | Winter (JFM) <sup>f</sup> | 0.92              | -0.50           | 0.91             | -2.04 | 0.76            | -1.68 | 0.71              | -1.07 | 0.80            | -2.10 | 0.69 | -0.047  |
| 2016        | Spring (AMJ)              | 0.88              | -0.51           | 0.89             | -0.66 | 0.75            | -0.47 | 0.78              | -1.71 | 0.67            | -0.94 | 0.66 | -0.017  |
|             | Summer (JAS)              | 0.88              | -0.41           | 0.85             | -0.47 | 0.72            | -0.71 | 0.83              | -2.91 | 0.60            | -0.89 | 0.65 | -0.020  |
|             | Autumn (OND)              | 0.94              | -0.42           | 0.93             | -1.59 | 0.84            | -1.58 | 0.87              | -1.12 | 0.82            | -0.67 | 0.76 | -0.025  |
|             | Winter (JFM)              | 0.91              | -0.84           | 0.91             | -1.74 | 0.78            | -1.28 | 0.77              | -0.10 | 0.80            | -1.61 | 0.74 | -0.023  |
| 2017        | Spring (AMJ)              | 0.92              | -1.00           | 0.92             | -1.70 | 0.79            | -0.89 | 0.91              | -2.59 | 0.71            | -0.46 | 0.64 | -0.012  |
|             | Summer (JAS)              | 0.90              | -0.66           | 0.89             | -1.62 | 0.75            | -0.55 | 0.91              | -2.04 | 0.65            | -0.06 | 0.72 | -0.008  |
|             | Autumn (OND)              | 0.95              | -0.79           | 0.93             | -1.87 | 0.85            | -1.91 | 0.91              | -1.03 | 0.77            | -0.25 | 0.78 | 0.00001 |
|             | Winter (JFM)              | 0.94              | -1.16           | 0.93             | -1.52 | 0.84            | -1.22 | 0.84              | -0.93 | 0.83            | -0.35 | 0.78 | -0.028  |
| 2018        | Spring (AMJ)              | 0.92              | -0.25           | 0.93             | -1.67 | 0.79            | -0.68 | 0.92              | -1.35 | 0.68            | -0.42 | 0.66 | 0.003   |
|             | Summer (JAS)              | 0.87              | -0.06           | 0.86             | -0.75 | 0.75            | -0.31 | 0.91              | -1.01 | 0.62            | -0.17 | 0.65 | 0.010   |
|             | Autumn (OND)              | 0.95              | 0.07            | 0.95             | -0.79 | 0.85            | -0.62 | 0.94              | -0.48 | 0.76            | -0.49 | 0.77 | 0.002   |
|             | Winter (JFM)              | 0.95              | -1.17           | 0.94             | -2.25 | 0.84            | -0.73 | 0.91              | -0.02 | 0.78            | -0.34 | 0.77 | -0.004  |
| All seasons | 2015                      | 0.92              | -0.75           | 0.91             | -1.24 | 0.77            | -1.66 | 0.81              | -1.79 | 0.77            | -1.83 | 0.71 | -0.023  |
|             | 2016                      | 0.93              | -0.55           | 0.92             | -1.13 | 0.81            | -1.03 | 0.86              | -1.44 | 0.79            | -1.03 | 0.74 | -0.021  |
|             | 2017                      | 0.95              | -0.90           | 0.93             | -1.68 | 0.84            | -1.14 | 0.92              | -1.66 | 0.81            | -0.28 | 0.77 | -0.012  |
|             | 2018                      | 0.95              | -0.36           | 0.94             | -1.38 | 0.84            | -0.59 | 0.94              | -0.72 | 0.77            | -0.36 | 0.76 | 0.0072  |

Note: <sup>a</sup>. Pearson's correlation (defined in <sup>9</sup>), unit:  $\mu\text{g}/\text{m}^3$  for PM<sub>2.5</sub>, PM<sub>10</sub>, NO<sub>2</sub>, O<sub>3</sub>A8, SO<sub>2</sub> and  $\text{mg}/\text{m}^3$  for CO; <sup>b</sup>. Mean bias; April, May and June; <sup>c</sup>. July, August and September; <sup>d</sup>. October, November and December; <sup>e</sup>. January, February and March.

## Supplementary Table 11

### Yearly mean of criteria air pollutants for mainland China.

| Year | National Mean        | All <sup>a</sup> | PM <sub>2.5</sub> | NO <sub>2</sub> | PM <sub>10</sub> | O <sub>3</sub> A8 <sup>b</sup> | O <sub>3</sub> M24 <sup>c</sup> | SO <sub>2</sub> | CO   |
|------|----------------------|------------------|-------------------|-----------------|------------------|--------------------------------|---------------------------------|-----------------|------|
| 2015 | Con. <sup>d</sup>    | -                | 35                | 16              | 80               | 86                             | 94                              | 18              | 0.85 |
|      | Con. PD <sup>e</sup> | -                | 51                | 27              | 87               | 85                             | 99                              | 20              | 1    |
|      | AQI <sup>f</sup>     | 75               | 48                | 19              | 62               | 46                             | 30                              | 18              | 21   |
|      | AQI. PD <sup>g</sup> | 84               | 69                | 34              | 66               | 47                             | 33                              | 19              | 24   |
| 2016 | Con.                 | -                | 32                | 16              | 75               | 87                             | 94                              | 17              | 0.84 |
|      | Con. PD              | -                | 47                | 28              | 81               | 87                             | 101                             | 19              | 0.97 |
|      | AQI                  | 73               | 45                | 19              | 60               | 46                             | 30                              | 17              | 21   |
|      | AQI. PD              | 80               | 64                | 34              | 63               | 47                             | 34                              | 18              | 24   |
| 2017 | Con.                 | -                | 31                | 16              | 72               | 90                             | 97                              | 16              | 0.82 |
|      | Con. PD              | -                | 42                | 28              | 80               | 92                             | 107                             | 17              | 0.94 |
|      | AQI                  | 72               | 43                | 19              | 58               | 48                             | 31                              | 16              | 20   |
|      | AQI. PD              | 80               | 62                | 33              | 62               | 51                             | 37                              | 16              | 23   |
| 2018 | Con.                 | -                | 30                | 15              | 73               | 90                             | 97                              | 14              | 0.78 |
|      | Con. PD              | -                | 42                | 26              | 76               | 92                             | 108                             | 14              | 0.88 |
|      | AQI                  | 72               | 41                | 18              | 59               | 48                             | 31                              | 14              | 19   |
|      | AQI. PD              | 78               | 57                | 32              | 60               | 51                             | 37                              | 14              | 22   |

Note: <sup>a</sup>. AQI for all air pollutants; <sup>b</sup>. O<sub>3</sub>A8: 8-hour average of O<sub>3</sub>; <sup>c</sup>. O<sub>3</sub>M24: Hourly maximum of daily O<sub>3</sub>; <sup>d</sup>. Air pollutant concentration (Unit: μg/m<sup>3</sup> for SO<sub>2</sub>, O<sub>3</sub>, PM<sub>2.5</sub>, PM<sub>10</sub>. NO<sub>2</sub>; mg/m<sup>3</sup> for CO); <sup>e</sup>. Air pollutant concentration weighted by population density; <sup>f</sup>. AQI; <sup>g</sup>. AQI weighted by population density.

## Supplementary References

- 1 NASA. *MERRA-2 GMI* <<https://acd-ext.gsfc.nasa.gov/Projects/GEOSCCM/MERRA2GMI/>> (2018).
- 2 Li, L. F. High-Resolution Mapping of Aerosol Optical Depth and Ground Aerosol Coefficients for Mainland China. *Remote Sensing* **13**, doi:10.3390/rs13122324 (2021).
- 3 Lundberg, S. M. & Lee, S. I. A Unified Approach to Interpreting Model Predictions. *Advances in Neural Information Processing Systems 30 (Nips 2017)* **30** (2017).
- 4 Lundberg, S. M. *Welcome to the SHAP documentation*, <<https://shap.readthedocs.io/en/latest/index.html>> (2018).
- 5 Ministry of Environmental Protection of China. *Technical Regulation on Ambient Air Quality Index*. (China Environmental Science Press, 2012).
- 6 Li, L. F. *et al.* Ensemble-based deep learning for estimating PM2.5 over California with multisource big data including wildfire smoke. *Environment International* **145**, doi:10.1016/j.envint.2020.106143 (2020).
- 7 Fang, Y. & Li, L. Estimation of high-precision high-resolution meteorological factors based on machine learning. *Journal of Geo-information Sciences (in Chinese)* **21**, 799-813 (2019).
- 8 Li, L. Geographically Weighted Machine Learning and Downscaling for High-Resolution Spatiotemporal Estimations of Wind Speed. *Remote Sensing* **11**, 1378 (2019).
- 9 Sicard, P. *et al.* High spatial resolution WRF-Chem model over Asia: Physics and chemistry evaluation. *Atmospheric Environment* **244**, 118004 (2021).
